# Supplementary material for: Identification of COS markers specific for Thinopyrum elongatum chromosomes preliminary revealed high level of macrosyntenic relationship between the wheat and Th. elongatum genomes
Source: PLoS One. 2018 Dec 12;13(12):e0208840. doi: 10.1371/journal.pone.0208840 (PMC6291125; doi:10.1371/journal.pone.0208840)
Supplement: S2 Table — (XLSX) [file pone.0208840.s007.xlsx]

## Sheet: Metadata
	S2 Table. The size and concentration (in ng/μL) of PCR products of COS markers amplified from total genomic DNA (gDNA) of wheat (CS), wheat-Th. elongatum amphiploid line (Amp), from Chinese Spring -Th. elongatum disomic addition lines (1E, 2E, 3E, 4E, 5E, 6E, 7E) and from 12 ditelosomic addition lines (1ES, 1EL, 2ES, 2EL, 3ES, 3EL, 4ES, 5ES, 5EL, 6ES, 7ES, 7EL). The concentration (in ng/μL) of PC…

## Sheet: E genome results
	Group position		Amp		CS		1E		1ES		1EL		2E		2ES		2EL		4E		4ES		5E		5ES		5EL		6E		6ES		7E		7ES		7EL
Marker	Wheat	original wheat amplicon (bp)	size (bp)	ng/uL	size (bp)	ng/uL	size (bp)	ng/uL	size (bp)	ng/uL	size (bp)	ng/uL	size (bp)	ng/uL	size (bp)	ng/uL	size (bp)	ng/uL	size (bp)	ng/uL	size (bp)	ng/uL	size (bp)	ng/uL	size (bp)	ng/uL	size (bp)	ng/uL	size (bp)	ng/uL	size (bp)	ng/uL	size (bp)	ng/uL	size (bp)	ng/uL	size (bp)	ng/uL
BE443103	I	347	157	0.5781	157	0.4387	157	1.019	157	0.4057	157	0.5863	157	0.6446	157	0.7096	157	0.4862	157	1.7657	157	1.1513	157	0.8179	157	0.4795	157	1.4099	157	0.3927	157	0.5311	157	0.5879	157	1.2223	157	0.9013
			171	1.1647	171	0.9001	171	1.5842	171	0.9285	171	1.3115	171	1.5416	171	2.1634	171	1.0717	171	3.4668	171	2.2506	171	1.5773	171	1.027	171	1.4125	171	0.9109	171	0.9708	171	1.1203	171	2.4098	171	1.7957
			304	1.1665	304	0.766	304	1.2406	304	0.9062	304	1.0911	304	1.5094	304	3.7097	304	0.8103	304	3.6781	304	2.2802	304	1.6307	304	0.9607	304	1.3752	304	0.6302	304	0.9902	304	0.8024	304	1.5683	304	1.0953
757212	I	250	262	3.3911	-	-	262	2.6489	-	-	262	2.6573	-	-	-	-	-	-	-	-	-	-	-	-	-	-	-	-	-	-	-	-	-	-	-	-	-	-
735941	I	318	239	3.9893	239	0.9884	239	3.4763	239	4.6144	239	4.7108	239	3.5818	239	7.0729	239	3.7981	239	5.5456	239	4.9349	239	4.1249	239	4.7654	239	3.7501	239	4.4594	239	7.3897	239	1.3841	239	5.4708	239	3.3856
			246	2.2398	246	2.2398	246	2.0361	246	1.5633	246	2.6869	246	1.073	246	1.8118	246	0.9847	246	1.5626	246	1.4473	247	0.878	246	1.6997	246	0.977	246	1.3208	246	2.0766	246	0.3349	246	1.3548	246	0.8796
743018	I	385	-	-	300	12.3439	-	-	-	-	-	-	-	-	-	-	-	-	-	-	-	-	-	-	-	-	-	-	-	-	-	-	-	-	-	-	-	-
			305	13.3216	-	-	305	4.5797	305	10.0076	305	8.5214	305	6.3864	305	4.8835	305	4.4552	305	2.1943	305	5.7748	305	9.0793	305	12.4718	305	13.062	305	26.8216	305	55,3725 gyenge a markerjel	305	4.9846	305	10.9159	305	6.6774
			-	-	311	11.4099	-	-	-	-	-	-	-	-	-	-	-	-	-	-	-	-	-	-	-	-	-	-	-	-	-	-	-	-	-	-	-	-
			316	16.4918	-	-	316	8.6831	316	9.0362	316	13.5614	316	6.7489	316	6.6977	316	6.3485	316	2.9022	316	7.31	316	7.1618	316	8.8206	316	10.9129	316	12.6835	316	52.5305	316	5.5299	316	9.3318	316	8.0082
744533	I	256	241	3.302	241	3.5616	241	3.4803	241	2.9294	241	3.6254	241	2.7983	241	6.8469	241	3.1019	241	3.7869	241	4.5913	241	5.3365	241	3.6695	241	6.9308	241	4.5871	241	4.3074	241	2.5928	241	7.799	241	7.4217
			245	2.6478	-	-	245	0.6563	-	-	245	0.7248	-	-	-	-	-	-	-	-	-	-	-	-	-	-	-	-	-	-	-	-	-	-	-	-	-	-
			250	0.4336	-	-	250	0.2426	-	-	250	0.314	-	-	-	-	-	-	-	-	-	-	-	-	-	-	-	-	-	-	-	-	-	-	-	-	-	-
738964	I	391	377	6.0413	377	15.1641	377	2.4297	377	11.5679	377	13.0141	377	8.929	377	10.2255	377	3.0217	377	15.6744	377	6.5391	377	6.6929	377	11.3863	377	7.5008	377	14.0897	377	21.3706	377	1.3061	377	6.2605	377	9.5521
726029	I	293	319	18.7546	319	16.5436	319	10.4173	319	18.8395	319	2.0696	319	2.4986	319	1.4674	319	1.5035	319	7.0588	319	11.3369	319	18.7688	319	4.6344	319	10.2133	319	10.0234	319	20.0935	319	12.4952	319	16.1033	319	1.7717
743346	I	286	275	14.1561	275	12.6193	275	10.2834	275	12.4597	275	7.5962	275	1.8204	275	3.4876	275	2.2255	275	10.1754	275	12.3202	275	8.8528	275	14.6926	275	9.1095	275	5.9811	275	17.1486	275	9.9211	275	10.1077	275	12.8187
			281	13.0719	281	12.837	281	10.6077	281	12.7477	281	9.1435	281	2.4503	281	4.3775	281	3.1719	281	10.0209	281	12.0385	281	8.4572	281	13.0796	281	12.264	281	6.6901	281	16.5192	281	9.7149	281	9.8015	281	12.8346
737520	I	348	371	18.1493	371	34.4799	371	17.3666	371	25.0004	371	32.9429	371	24.2841	371	34.4609	371	36.6558	371	36.2536	371	25.1558	371	36.4427	371	38.3547	371	29.8499	371	43.116	371	42.1366	371	28.0924	371	51.6385	371	33.4924
			377	14.0775	-	-	377	12.9991	377	15.631	-	-	-	-	-	-	-	-	-	-	-	-	-	-	-	-	-	-	-	-	-	-	-	-	-	-	-	-
			385	5.9938	385	10.3039	385	5.0272	385	9.5598	385	10.2664	385	7.875	385	11.1785	385	11.1581	385	11.8892	385	8.1173	385	12.0798	385	12.6888	385	9.1649	385	13.4235	385	13.3718	385	8.5743	385	16.4923	385	10.4321
			425	1.6586	-	-	425	1.5559	425	1.3504	-	-	-	-	-	-	-	-	-	-	-	-	-	-	-	-	-	-	-	-	-	-	-	-	-	-	-	-
			430	2.2492	-	-	430	2.0288	430	2.1336	-	-	-	-	-	-	-	-	-	-	-	-	-	-	-	-	-	-	-	-	-	-	-	-	-	-	-	-
			436	3.5666	436	6.6761	436	3.7228	436	5.8315	436	6.955	436	5.779	436	7.275	436	7.5125	436	7.698	436	5.6614	436	9.0442	436	8.6151	436	6.5287	436	8.8949	436	9.057	436	6.2246	436	11.9578	436	6.7592
1J	I	228	169	18.591	169	21.1275	169	12.3915	169	20.362	169	14.9021	169	17.9303	169	27.6112	169	21.7129	169	21.885	169	13.4788	169	20.3163	169	20.5071	169	17.7207	169	23.6132	169	17.5173	169	16.8994	169	24.8827	169	23.1147
			175	7.2162	175	4.839	175	4.7452	175	4.7287	175	5.6387	175	4.0853	175	6.5087	175	5.374	175	5.1149	175	3.0313	175	4.7126	175	4.7238	175	3.9758	175	5.9942	175	4.5905	175	3.7923	175	5.8798	175	5.5927
			181	5.2757	181	5.5658	181	4.0886	181	5.7974	181	4.3939	181	4.7687	181	7.7954	181	6.825	181	5.8935	181	3.3155	181	5.0572	181	5.2656	181	7.1284	181	6.3973	181	5.673	181	4.434	181	6.861	181	6.3582
744747	I	338	358	12.3419	358	13.3086	358	7.4657	358	7.5963	358	7.9278	358	9.6182	358	17.7579	358	6.5079	358	18.1779	358	8.2026	358	5.2127	358	7.0842	358	11.1919	358	7.8783	358	4.6314	358	3.9774	358	6.4827	358	5.2816
TR196	I	n.i.	202	3.5986	202	8.0288	202	3.7427	202	5.3699	202	6.1489	202	3.8215	202	5.9752	202	13.2833	202	8.284	202	3.766	202	3.8141	202	2.503	202	5.0878	202	8.2468	202	5.5203	202	3.8028	202	5.9822	202	4.6468
			210	4.0153	210	2.5891	210	1.1234	210	1.3804	210	1.8399	210	1.0559	210	1.5503	210	1.5055	210	2.6674	210	4.6268	210	4.1003	210	0.8213	210	1.6882	210	2.3363	210	6.8801	210	4.1482	210	4.5599	210	1.2601
			214	2.1672	214	3.1813	214	1.3536	214	1.8497	214	1.9649	214	0.8875	214	2.0011	214	1.9526	214	3.1668	214	2.2921	214	2.1405	214	0.8724	214	2.064	214	2.5725	214	3.346	214	1.7825	214	1.8867	214	1.1255
TR170	I	n.i.	217	0.1036	217	0.6191	217	0.1606	217	0.1705	217	0.741	217	0.0791	217	0.499	217	0.1708	217	0.5206	217	0.0945	217	0.0945	217	0.9695	217	0.517	217	0.8053	217	1.3456	217	1.0821	217	0.6052	217	1.7164
			230	0.0369	230	0.2746	230	0.0649	230	0.0423	230	0.4117	230	0.0615	230	0.2957	230	0.0947	230	0.3155	230	0.0241	230	0.0052	230	0.4486	230	0.2049	230	0.3802	230	0.852	230	0.4245	230	0.2223	230	0.9438
TR218	I	n.i.	321	0.8609	321	0.5806	321	0.2494	321	0.7006	321	1.7159	321	2.0724	321	1.0394			321	2.0198	321	0.2853	321	0.3423	321	1.2346	321	0.4213	321	2.3046	321	0.6313	321	1.6748	321	1.7613	321	2.1406
TR574	I	n.i.	226	2.3352	-	-	226	2.9235	-	-	226	3.799	-	-	-	-	-	-	-	-	-	-	-	-	-	-	-	-	-	-	-	-	-	-	-	-	-	-
			238	2.8981	-	-	238	4.1439	-	-	238	4.7181	-	-	-	-	-	-	-	-	-	-	-	-	-	-	-	-	-	-	-	-	-	-	-	-	-	-
			242	5.9603	242	13.1073	242	6.0636	242	10.5922	242	8.7769	242	11.0914	242	15.2989	242	22.1958	242	15.9009	242	11.7906	242	10.4232	242	15.5072	242	11.2745	242	16.1933	242	8.5422	242	11.4471	242	15.2927	242	12.1982
			254	7.5535	254	17.1238	254	8.6573	254	14.5631	254	16.0006	254	15.4921	254	19.2603	254	31.1838	254	29.5617	254	14.3048	254	12.5589	254	19.2849	254	14.6623	254	19.9604	254	11.8795	254	15.5155	254	26.5014	254	15.2725
			356	1.0222	-	-	356	1.1931	-	-	356	1.4283	-	-	-	-	-	-	-	-	-	-	-	-	-	-	-	-	-	-	-	-	-	-	-	-	-	-
			368	1.2536	-	-	368	1.5035	-	-	368	1.8595	-	-	-	-	-	-	-	-	-	-	-	-	-	-	-	-	-	-	-	-	-	-	-	-	-	-
			381	1.5763	-	-	381	1.9918	-	-	381	2.3777	-	-	-	-	-	-	-	-	-	-	-	-	-	-	-	-	-	-	-	-	-	-	-	-	-	-
TR592	I	n.i.	212	18.8358	212	20.0557	212	15.9165	212	19.4405	212	22.1603	212	21.2764	212	24.5506	212	23.3728	212	23.1169	212	13.4893	212	19.7096	212	19.9387	212	19.6701	212	18.853	212	12.6139	212	21.4131	212	24.5458	212	18.3695
			223	4.1343	223	4.5133	223	3.5105	223	4.0154	223	4.9266	223	5.3805	223	5.4408	223	5.6135	223	5.3905	223	3.1262	223	4.7095	223	4.8007	223	4.5908	223	4.9377	223	3.042	223	5.0264	223	5.4016	223	4.3072
757237	II	259	260	4.4697	260	3.2565	260	10.1385	260	14.7915	260	13.8836	260	11.3612	260	7.804	260	10.664	260	4.7236	260	11.0214	260	3.7199	260	12.1307	260	10.7572	260	7.3378	260	18.6663	260	1.8567	260	4.4025	260	7.9733
			268	7.349	268	5.4758	268	15.313	268	22.0279	268	22.345	268	17.2323	268	11.868	268	18.0277	268	7.8535	268	17.0581	268	6.1197	268	17.4527	268	23.9492	268	10.7684	268	26.9401	268	3.1543	268	7.1635	268	11.9197
2R	II	267	290	7.0222	290	4.8831	290	6.2962	290	3.957	290	11.634	290	5.739	290	12.1528	290	6.2872	290	16.5475	290	10.7389	290	8.7155	290	9.463	290	14.4709	290	11.9806	290	9.9961	290	4.3193	290	8.258	290	5.5207
			297	5.8214	-	-	-	-	-	-	-	-	297	1.4173	297	3.4849	-	-	-	-	-	-	-	-	-	-	-	-	-	-	-	-	-	-	-	-	-	-
2N	II	558	563	0.8543	563	1.5198	563	1.4716	563	1.3923	563	2.4556	563	1.1301	563	1.8654	563	1.4065	563	3.0313	563	2.1446	563	2.6118	563	5.1838	563	2.6362	563	0.9338	563	3.1392	563	2.7265	563	3.6646	563	3.7131
			571	2.5176	571	2.3729	571	0.6576	571	1.0241	571	2.5439	571	1.4511	571	1.134	571	1.4876	571	1.8722	571	1.4511	571	1.563	571	1.0052	571	1.2184	571	2.427	571	1.856	571	1.2968	571	2.2909	571	2.215
			589	0.5864	589	1.8194	589	2.4689	589	0.6418	589	1.6816	589	0.6027	589	1.3852	589	0.5821	589	1.7055	589	2.3603	589	1.209	589	1.9291	589	1.0982	589	0.99	589	1.5985	589	1.0733	589	3.2282	589	2.8222
			673	1.6129	-	-	-	-	-	-	-	-	673	1.1479	-	-	673	1.1374	-	-	-	-	-	-	-	-	-	-	673	1.9691	-	-	-	-	-	-	-	-
744070	II	758	221	4.6015	221	4.5344	221	3.61	221	4.5485	221	4.4431	221	4.6168	221	4.5698	221	6.5626	221	3.8534	221	5.7559	221	3.1464	221	4.631	221	4.1536	221	4.3043	221	5.0569	-	-	221	4.4776	221	6.3975
			225	4.6105	225	5.3132	225	4.4484	225	5.4189	225	5.6756	225	4.9608	225	5.258	225	6.5239	225	4.3887	225	6.9785	225	3.7313	225	4.9558	225	5.1637	225	7.3674	225	5.8459	-	-	225	5.1327	225	7.0126
			245	0.0331	-	-	-	-	-	-	-	-	245	0.1253	-	-	245	0.082	-	-	-	-	-	-	-	-	-	-	245	0.6275	-	-	-	-	-	-	-	-
TR146	II	303	244	0.2798	244	0.176	244	0.5441	244	0.0845	244	0.0516	244	0.6765	244	1.6456	244	2.1584	244	0.532	244	0.1628	244	0.0174	244	0.2501	244	0.1025	244	0.6907	244	0.2574	244	0.5329	244	0.1514	244	0.1808
			252	0.1161	252	0.0805	252	0.2047	252	0.0366	252	0.0146	252	0.2726	252	0.5469	252	0.6363	252	0.2109	252	0.0694	252	0.057	252	0.1022	252	0.0594	252	0.2676	252	0.1286	252	0.2004	252	0.0671	252	0.0869
			308	0.0123	-	-	-	-	-	-	-	-	308	0.0438	-	-	308	0.1863	-	-	-	-	-	-	-	-	-	-	308	0.0509	-	-	-	-	-	-	-	-
			319	0.0605	-	-	-	-	-	-	-	-	319	0.1504	-	-	319	0.6327	-	-	-	-	-	-	-	-	-	-	319	0.1582	-	-	-	-	-	-	-	-
			326	0.0152	-	-	-	-	-	-	-	-	326	0.0529	-	-	326	0.1855	-	-	-	-	-	-	-	-	-	-	326	0.0544	-	-	-	-	-	-	-	-
740970	II	439	234	17.576	234	17.5645	234	13.2536	234	16.099	234	19.344	234	16.6556	234	25.5814	234	11.135	234	26.6665	234	25.0028	234	18.9904	234	19.1859	234	24.6392	234	20.254	234	23.5586	234	14.4766	234	21.6509	234	22.9281
TR248	II	208	387	0.327	387	2.8211	387	0.6779	387	1.7006	387	1.5986	387	1.9533	387	3.1225	387	2.4295	387	0.8511	387	0.5073	387	3.067	387	3.8082	387	1.468	387	3.1906	387	2.8668	387	1.592	387	2.6349	387	3.218
			393	1.294	393	3.3131	393	1.0833	393	2.3368	393	2.1803	393	2.4066	393	3.957	393	2.9188	393	1.2456	393	0.7358	393	3.3485	393	4.2021	393	2.1138	393	3.7735	393	3.4389	393	2.2099	393	3.0498	393	3.7312
			403	0.9325	403	0.5058	403	0.2282	403	0.4091	403	0.3814	403	0.4167	403	0.6385	403	0.4533	403	0.2951	403	0.1864	403	0.4396	403	0.5784	403	0.4415	403	0.5472	403	0.4936	403	0.3801	403	0.4244	403	0.5383
746642	II	808	-	-	661	7.6785	661	2.17	661	13.2656	661	13.8057	-	-	661	5.819	-	-	661	19.0874	661	5.377	661	10.2583	661	12.7542	661	8.5592	-	-	661	14.9507	661	8.7359	661	5.3989	661	5.5884
			667	1.856	-	-	-	-	-	-	-	-	667	2.2232	-	-	667	1.8049	-	-	-	-	-	-	-	-	-	-	667	1.9791	-	-	-	-	-	-	-	-
			-	-	672	4.2432	672	0.5208	672	3.4534	672	2.6991	-	-	672	3.5743	-	-	672	6.1579	672	2.8307	672	3.249	672	3.3767	672	2.8178	-	-	672	4.4057	672	3.1203	672	1.9189	672	1.5365
			676	4.7806	-	-	-	-	-	-	-	-	676	5.2952	-	-	676	5.4433	-	-	-	-	-	-	-	-	-	-	676	5.4558	-	-	-	-	-	-	-	-
			843	1.4335	-	-	-	-	-	-	-	-	843	1.5726	-	-	843	1.6809	-	-	-	-	-	-	-	-	-	-	843	1.4918	-	-	-	-	-	-	-	-
			892	2.0781	-	-	-	-	-	-	-	-	892	2.3768	-	-	892	2.3269	-	-	-	-	-	-	-	-	-	-	892	2.5276	-	-	-	-	-	-	-	-
TR416	II	1500	275	0.152	275	0.2273	275	0.1318	275	0.2523	275	0.3017	275	0.1641	275	0.2122	275	0.5305	275	0.6815	275	0.5925	275	0.0535	275	0.7426	275	0.3023	275	0.5943	275	0.4	275	0.3885	275	0.5131	275	0.5436
			283	0.3854	283	0.5445	283	0.3282	283	0.5825	283	0.7089	283	0.3738	283	0.4939	283	1.1437	283	1.4603	283	1.249	283	0.1435	283	1.5756	283	0.7197	283	1.2218	283	0.9376	283	0.9006	283	1.1025	283	1.1636
			323	0.115	323	0.0811	323	0.0216	323	0.1155	323	0.1424	323	0.1883	323	0.187	323	0.2251	323	0.3067	323	0.1934	323	0.0146	323	0.2335	323	0.0922	323	0.2723	323	0.1146	323	0.1066	323	0.2911	323	0.2738
			332	0.2615	332	0.1715	332	0.0599	332	0.2425	332	0.3006	332	0.3722	332	0.3907	332	0.4319	332	0.5901	332	0.364	332	0.0307	332	0.4463	332	0.1882	332	0.5082	332	0.2317	332	0.2197	332	0.5933	332	0.5682
			403	0.0247	-	-	-	-	-	-	-	-	403	0.0551	403	0.0332	-	-	-	-	-	-	-	-	-	-	-	-	-	-	-	-	-	-	-	-	-	-
			408	0.0938	-	-	-	-	-	-	-	-	408	0.1384	408	0.1291	-	-	-	-	-	-	-	-	-	-	-	-	-	-	-	-	-	-	-	-	-	-
			418	0.0323	-	-	-	-	-	-	-	-	418	0.0742	418	0.0605	-	-	-	-	-	-	-	-	-	-	-	-	-	-	-	-	-	-	-	-	-	-
TR430	II	n.i.	255	3.0521	-	-	-	-	-	-	-	-	-	-	-	-	-	-	-	-	-	-	-	-	-	-	-	-	255	6.1255	255	8.771	-	-	-	-	-	-
			268	4.3334	268	10.7492	268	7.7051	268	12.5454	268	14.7775	268	11.7405	268	13.3846	268	12.4261	268	15.5649	268	10.7629	268	8.932	268	12.8575	268	12.7387	268	12.248	268	12.3467	268	12.5069	268	14.2772	268	16.5077
			300	0.7474	-	-	-	-	-	-	-	-	300	1.5319	300	1.8065	-	-	-	-	-	-	-	-	-	-	-	-	-	-	-	-	-	-	-	-	-	-
			315	0.8828	-	-	-	-	-	-	-	-	315	1.7935	315	2.0685	-	-	-	-	-	-	-	-	-	-	-	-	-	-	-	-	-	-	-	-	-	-
TR731	II	378	323	0.8119	323	1.6594	323	0.4081	323	2.9378	323	1.3616	323	1.1915	323	2.382	323	1.7204	323	3.4079	323	1.7927	323	1.4287	323	2.9062	323	1.555	323	1.6393	323	1.4347	323	1.0734	323	1.4295	323	0.9433
			391	1.1475	391	0.9922	391	0.1826	391	1.9618	391	0.9794	391	2.7001	391	3.6673	391	0.923	391	1.7315	391	1.1702	391	0.5649	391	2.2024	391	1.061	391	1.3741	391	1.6834	391	0.5473	391	1.6008	391	0.6139
TR725	II	n.i.	414	0.0895	-	-	-	-	-	-	-	-	414	0.1302	414	0.1834	-	-	-	-	-	-	-	-	-	-	-	-	-	-	-	-	-	-	-	-	-	-
			424	0.0256	-	-	-	-	-	-	-	-	424	0.059	424	0.0652	-	-	-	-	-	-	-	-	-	-	-	-	-	-	-	-	-	-	-	-	-	-
TR390	II	n.i.	225	9.0553	225	6.2315	225	4.8244	225	5.179	225	5.2655	225	4.5981	225	9.3838	225	5.8692	225	5.529	225	6.4416	225	8.8639	225	5.9701	225	7.4578	225	9.9911	225	4.0153	225	5.4258	225	7.7513	225	5.5226
			230	10.9168	230	7.9628	230	5.8206	230	6.2716	230	6.6453	230	5.8198	230	12.0946	230	7.9651	230	7.4463	230	8.4134	230	12.2129	230	9.093	230	8.8395	230	13.6859	230	5.2994	230	5.2627	230	9.5549	230	7.1352
TR143	II	n.i.	339	12.6778	339	8.7503	339	4.8596	339	8.3901	339	9.6998	339	6.2853	339	11.1504	339	14.0922	339	26.3479	339	9.5742	339	7.8852	339	14.8115	339	8.4249	339	10.9714	339	7.1846	339	5.5709	339	10.2315	339	14.7168
TR636	II	n.i.	248	3.3639	-	-	-	-	-	-	-	-	248	4.711	-	-	248	5.9263	-	-	-	-	-	-	-	-	-	-	248	6.1899	-	-	-	-	-	-	-	-
			272	5.1221	272	9.873	272	6.3559	272	9.103	272	10.5813	272	8.8813	272	10.6006	272	6.5921	272	10.7957	272	9.9834	272	12.8716	272	10.6878	272	14.516	272	7.6215	272	7.2083	272	7.8676	272	12.3339	272	8.7824
			316	1.0344	-	-	-	-	-	-	-	-	-	-	-	-	-	-	-	-	-	-	-	-	-	-	-	-	316	1.7949	316	1.8063	-	-	-	-	-	-
			328	1.1926	-	-	-	-	-	-	-	-	-	-	-	-	-	-	-	-	-	-	-	-	-	-	-	-	328	2.3983	328	2.559	-	-	-	-	-	-
BE424990	II	311	-	-	330	15.2204	330	17.2685	330	17.2606	330	23.6976	-	-	330	26.5473	-	-	330	28.1774	330	23.797	330	24.3814	330	18.8954	330	23.7865	-	-	330	21.8818	330	14.6445	330	23.9307	330	22.3123
			-	-	340	57.631	340	58.3941	340	52.8194	340	70.4933	-	-	340	88.8174	-	-	340	93.0362	340	69.2216	340	70.2562	340	60.3814	340	54.5743	-	-	340	64.6777	340	37.7456	340	77.1214	340	72.9573
			344	35.1326	-	-	-	-	-	-	-	-	344	30.007	-	-	344	26.7613	-	-	-	-	-	-	-	-	-	-	344	23.4992	-	-	-	-	-	-	-	-
			355	71.3223	-	-	-	-	-	-	-	-	355	64.4758	-	-	355	52.3586	-	-	-	-	-	-	-	-	-	-	355	49.5081	-	-	-	-	-	-	-	-
			374	1.9561	-	-	-	-	-	-	-	-	374	1.8721	-	-	374	1.3148	-	-	-	-	-	-	-	-	-	-	374	1.8469	-	-	-	-	-	-	-	-
			379	2.5086	-	-	-	-	-	-	-	-	379	1.9225	-	-	379	1.7908	-	-	-	-	-	-	-	-	-	-	379	2.0191	-	-	-	-	-	-	-	-
BE442884	II	289	321	54.2124	321	28.7015	321	20.9987	321	31.5097	321	38.3876	321	47.6691	321	25.1927	321	39.4335	321	34.5392	321	35.0181	321	44.8615	321	26.6324	321	23.4561	321	24.9288	321	41.5532	321	25.0213	321	31.9713	321	26.9655
			330	81.3212	330	51.0995	330	33.2029	330	42.0118	330	50.6066	330	72.0927	330	36.7572	330	58.8762	330	46.2754	330	59.3767	330	69.7692	330	33.8488	330	34.9765	330	37.6705	330	55.3542	330	34.2869	330	53.2233	330	49.5063
BE443185	II	391	380	18.0426	380	13.499	380	8.0616	380	16.2033	380	16.9142	380	11.6671	380	16.5914	380	16.4547	380	14.1108	380	13.4323	380	15.9656	380	16.9114	380	14.7487	380	16.378	380	16.7433	380	13.6518	380	14.4644	380	14.3387
			456	0.2319	-	-	-	-	-	-	-	-	456	0.1075	-	-	456	0.188	-	-	-	-	-	-	-	-	-	-	456	0.2887	-	-	-	-	-	-	-	-
BE495372	II	416	383	1.8024	383	6.6441	383	1.6287	383	6.2712	383	4.0394	383	2.1742	383	3.7253	383	2.1813	383	7.0374	383	2.6411	383	2.7747	383	5.3868	383	2.5792	383	2.3517	383	3.3035	383	2.2398	383	4.0562	383	4.546
			390	1.8234	390	2.2981	390	0.0906	390	1.1392	390	0.5844	390	1.9619	390	0.6077	390	2.2082	390	1.2049	390	0.3288	390	0.347	390	0.8581	390	0.6752	390	2.4713	390	0.4877	390	0.278	390	0.6006	390	0.6203
			464	0.7689	464	0.9508	464	0.0975	464	0.7772	464	0.536	464	0.8275	464	0.4452	464	0.8344	464	1.0291	464	0.2844	464	0.3435	464	0.9108	464	0.7652	464	1.0376	464	0.5152	464	0.2422	464	0.5297	464	0.3916
			481	0.2938	481	1.0498	481	0.0938	481	0.7866	481	0.4545	481	0.3199	481	0.4447	481	0.3522	481	0.9001	481	0.2685	481	0.2884	481	0.6965	481	0.8652	481	0.4241	481	0.3926	481	0.2476	481	0.4591	481	0.4805
			500	0.2599	500	0.7968	500	0.0691	500	0.5325	500	0.3179	500	0.2815	500	0.3132	500	0.3146	500	0.6771	500	0.194	500	0.2003	500	0.4603	500	0.6527	500	0.3809	500	0.2741	500	0.1741	500	0.3377	500	0.3456
			519	0.6798	-	-	-	-	-	-	-	-	519	0.8388	-	-	519	0.875	-	-	-	-	-	-	-	-	-	-	519	0.9965	-	-	-	-	-	-	-	-
BE443508	II	301	315	13.6058	315	15.6997	315	8.1493	315	16.0336	315	12.7389	315	12.4908	315	14.4302	315	10.6787	315	19.696	315	13.9897	315	14.4311	315	14.4476	315	13.8567	315	15.324	315	14.335	315	12.2873	315	13.9856	315	12.1332
BF473077	II	396	465	0.8806	465	2.5226	465	1.0405	465	2.1393	465	2.4114	465	3.9328	465	2.7043	465	3.6197	465	2.3489	465	5.7469	465	2.3668	465	3.2476	465	2.6528	465	3.0829	465	1.9889	465	0.8832	465	3.2494	465	2.0839
BF293215	II	391	390	10.8781	390	10.8854	390	11.099	390	12.223	390	9.5641	390	10.3644	390	12.5427	390	10.6111	390	11.5417	390	16.89	390	10.2042	390	11.9918	390	10.8672	390	11.9075	390	15.5117	390	6.6268	390	15.2563	390	10.7765
			414	12.3279	414	14.9205	414	3.0968	414	13.4222	414	7.8355	414	13.7121	414	15.592	414	13.3285	414	18.896	414	11.0341	414	13.6867	414	14.6255	414	15.9624	414	14.5006	414	16.3677	414	9.3238	414	11.1224	414	12.4887
TR62	III	178	175	10.5785	175	16.7356	175	13.3135	175	13.7549	175	13.8953	175	13.2023	175	18.6733	175	7.4539	175	24.0208	175	15.4441	175	11.4845	175	21.3099	175	15.8226	175	19.0337	175	19.1359	175	14.3692	175	21.1359	175	19.1612
			188	1.6326	-	-	-	-	-	-	-	-	-	-	-	-	-	-	-	-	-	-	-	-	-	-	-	-	-	-	-	-	-	-	-	-	-	-
			196	2.1752	-	-	-	-	-	-	-	-	-	-	-	-	-	-	-	-	-	-	-	-	-	-	-	-	-	-	-	-	-	-	-	-	-	-
751053	III	526	502	2.8844	502	2.0131	502	0.9226	502	2.4931	502	1.1207	502	3.5206	502	3.3046	502	1.7452	502	3.5926	502	2.3993	502	1.8716	502	2.5886	502	1.3286	502	3.5517	502	3.3232	502	2.9596	502	4.8829	502	3.9353
			520	2.3568	520	1.9855	520	0.8821	520	2.8169	520	1.0102	520	4.6535	520	3.6645	520	2.601	520	5.1465	520	3.4308	520	1.727	520	3.9633	520	1.7113	520	5.0433	520	4.6191	520	1.553	520	5.8093	520	4.5634
756059	III	366	402	1.5934	402	5.2119	402	2.8077	402	0.4768	402	7.5679	402	7.7419	402	7.4475	402	8.6459	402	10.0013	402	8.7234	402	1.3651	402	5.7495	402	0.5618	402	6.0165	402	4.9453	402	2.7296	402	7.8346	402	6.1557
			423	0.5933	423	1.2808	423	0.6652	423	0.1925	423	1.9041	423	1.84	423	1.684	423	1.6564	423	2.1391	423	2.0429	423	0.3394	423	1.4583	423	0.1199	423	1.5153	423	1.1788	423	0.5693	423	1.8318	423	1.4056
			445	0.8818	445	1.402	445	0.7581	445	0.2526	445	2.0689	445	2.0089	445	1.866	445	1.7891	445	2.2786	445	2.1636	445	0.3999	445	1.6287	445	0.1511	445	1.6848	445	1.2835	445	0.6616	445	2.0188	445	1.5434
			480	0.1752	-	-	-	-	-	-	-	-	-	-	-	-	-	-	-	-	-	-	-	-	-	-	-	-	-	-	-	-	-	-	-	-	-	-
			492	0.1871	-	-	-	-	-	-	-	-	-	-	-	-	-	-	-	-	-	-	-	-	-	-	-	-	-	-	-	-	-	-	-	-	-	-
755442	III	792	816	1.97	816	1.0714	816	0.297	816	2.1296	816	1.868	816	2.2974	816	1.1357	816	0.9122	816	4.3561	816	1.9122	816	1.0168	816	1.7048	816	1.6924	816	3.0907	816	2.3762	816	1.7081	816	2.5577	816	1.3142
			841	0.5324	841	2.2743	841	0.588	841	1.1578	841	1.5774	841	1.3267	841	1.245	841	1.0034	841	3.8946	841	1.858	841	1.6747	841	2.0352	841	1.4578	841	1.5179	841	1.8006	841	0.1597	841	1.4526	841	1.3495
			868	0.8416	-	-	-	-	-	-	-	-	-	-	-	-	-	-	-	-	-	-	-	-	-	-	-	-	-	-	-	-	-	-	-	-	-	-
TR80	III	429/487	437	0.8794	437	2.1754	437	0.5086	437	0.1383	437	0.4551	437	0.4474	437	1.8276	437	1.6651	437	2.5461	437	1.2385	437	0.0118	437	1.5084	437	0.7035	437	1.6399	437	1.0396	437	0.4882	437	1.404	437	1.0249
			476	0.4541	476	1.1926	476	0.3017	476	0.1145	476	0.1587	476	0.2232	476	0.4102	476	1.1565	476	0.8394	476	0.8818	476	0.08	476	0.5758	476	0.1926	476	0.7491	476	0.4011	476	0.1286	476	0.4645	476	0.3774
TR63	III	444/545	438	4.8204	438	3.7695	438	0.743	438	4.4677	438	4.3933	438	4.7656	438	4.7402	438	3.583	438	9.2197	438	3.2821	438	2.962	438	5.328	438	2.965	438	4.6208	438	4.2032	438	2.0078	438	2.2985	438	3.4397
			454	0.9796	454	1.9518	454	0.4615	454	1.4735	454	1.7309	454	2.7859	454	2.1126	454	1.0317	454	5.6865	454	2.2044	454	1.4425	454	2.5358	454	0.9667	454	1.8233	454	1.8611	454	1.7351	454	1.9239	454	1.1494
			517	0.7647	-	-	-	-	-	-	-	-	-	-	-	-	-	-	-	-	-	-	-	-	-	-	-	-	-	-	-	-	-	-	-	-	-	-
			564	1.1398	-	-	-	-	-	-	-	-	-	-	-	-	-	-	-	-	-	-	-	-	-	-	-	-	-	-	-	-	-	-	-	-	-	-
757460	III	871	601	0.1909	601	0.6568	-	-	601	0.468	601	0.3282	601	0.3036	601	0.4608	601	0.2218	601	1.1066	601	0.1901	601	0.3041	601	1.0824	601	0.1519	601	1.6812	601	0.6794	-	-	601	0.2341	601	0.4254
			618	0.3488	618	1.8965	-	-	618	1.5148	618	1.1265	618	0.9111	618	1.4681	618	0.4881	618	3.5124	618	0.4526	618	0.9967	618	3.2875	618	0.6341	618	4.3155	618	1.6805	-	-	618	0.7014	618	0.7467
803223	III	476	460	9.1107	460	4.8194	460	3.0238	460	3.2241	460	4.6539	460	4.9156	460	5.454	460	6.3571	460	7.0372	460	6.24	460	5.0897	460	4.9298	460	4.9368	460	5.7705	460	5.7743	460	3.6539	460	5.6419	460	5.9805
			472	14.3244	472	6.7719	472	6.9669	472	5.2036	472	6.3611	472	9.8171	472	7.3758	472	7.9347	472	10.3396	472	12.2303	472	9.1089	472	7.8547	472	9.3226	472	9.8564	472	8.5003	472	7.6023	472	9.3684	472	10.0842
			488	11.5605	488	4.3686	488	3.3843	488	3.4473	488	4.2603	488	6.0581	488	5.0253	488	5.3194	488	7.5363	488	7.1709	488	5.3	488	5.6572	488	5.5964	488	6.85	488	5.4875	488	4.5449	488	5.6301	488	5.8101
805553	III	440	448	9.3223	448	7.3426	448	5.7072	448	7.7678	448	8.3367	448	22.1064	448	15.106	448	8.0163	448	12.4145	448	17.084	448	10.729	448	13.2967	448	28.9822	448	35.6043	448	16.78	448	7.1608	448	13.8892	448	19.4344
752685	III	898	544	2.6433	544	5.5827	544	0.5508	544	1.1385	544	3.3302	544	2.8531	544	1.6682	544	1.8666	544	2.7282	544	1.9056	544	0.6553	544	2.88	544	0.3374	544	4.0393	544	0.699	544	0.6718	544	1.521	544	1.8709
			584	5.3764	584	6.8137	584	0.5275	584	1.9824	584	4.5141	584	3.321	584	3.3797	584	2.859	584	4.3749	584	2.3464	584	0.7111	584	4.0813	584	0.4417	584	5.0458	584	1.1986	584	1.3007	584	2.313	584	3.1118
			650	0.5704	-	-	-	-	-	-	-	-	-	-	-	-	-	-	-	-	-	-	-	-	-	-	-	-	-	-	-	-	-	-	-	-	-	-
			665	0.2934	-	-	-	-	-	-	-	-	-	-	-	-	-	-	-	-	-	-	-	-	-	-	-	-	-	-	-	-	-	-	-	-	-	-
			679	0.3597	-	-	-	-	-	-	-	-	-	-	-	-	-	-	-	-	-	-	-	-	-	-	-	-	-	-	-	-	-	-	-	-	-	-
TR72	III	179	169	5.4757	169	3.1921	169	5.1999	169	3.5487	169	4.5655	169	4.1081	169	3.578	169	6.6146	169	6.8224	169	3.5202	169	4.8117	169	3.3737	169	3.7417	169	4.4019	169	4.6357	169	5.0496	169	7.3601	169	5.2586
			203	2.3881	203	4.6325	203	2.0415	203	2.8414	203	2.1881	203	2.8833	203	4.6597	203	4.9328	203	3.4184	203	4.2239	203	3.4347	203	4.5169	203	1.6112	203	2.2271	203	3.2998	203	2.4684	203	3.6063	203	2.5507
			239	2.7475	239	4.2266	239	3.1524	239	3.8976	239	3.1334	239	2.9448	239	4.0437	239	3.8527	239	4.7066	239	3.1802	239	4.3151	239	3.788	239	3.3996	239	2.8958	239	2.4153	239	2.8711	239	4.537	239	2.9607
TR60	III	240	241	9.0838	241	8.4638	241	5.8374	241	11.2798	241	6.5305	241	8.6814	241	8.7714	241	10.7002	241	8.537	241	4.0926	241	9.0993	241	12.3439	241	9.8918	241	15.5831	241	8.8089	241	4.6748	241	11.9877	241	8.5667
TR71	III	248	561	0.1277	561	4.3588	561	0.6916	560	0.069	561	3.9067	561	4.8283	561	4.2946	561	5.4473	561	11.3642	561	2.6679	561	1.9545	561	6.2328	561	1.72	561	0.0341	561	0.1275	561	2.0814	561	2.0803	561	3.5818
TR73	III	473	520	9.9286	520	20.4293	520	9.1376	520	19.2924	520	8.9073	520	14.6445	520	15.311	520	17.0491	520	21.2613	520	7.4621	520	17.5585	520	21.225	520	22.014	520	20.0038	520	11.0714	520	5.9499	520	22.4173	520	13.1487
TR96	III	250	255	4.5578	255	7.1278	255	3.5221	255	6.4828	255	5.7781	255	6.3523	255	3.0198	255	6.2992	255	4.9502	255	4.7571	255	6.2777	255	13.4745	255	5.6055	255	9.3744	255	6.1939	255	4.3709	255	2.6767	255	3.3757
767527	III	294	327	7.219	327	7.5118	327	7.2272	327	10.7383	327	8.6813	327	8.7213	327	7.1877	327	8.1712	327	10.2106	327	6.8264	327	8.4979	327	8.9847	327	7.7038	327	5.6163	327	9.4345	327	7.8557	327	12.138	327	6.3185
			366	0.7223	-	-	-	-	-	-	-	-	-	-	-	-	-	-	-	-	-	-	-	-	-	-	-	-	-	-	-	-	-	-	-	-	-	-
			375	0.5059	-	-	-	-	-	-	-	-	-	-	-	-	-	-	-	-	-	-	-	-	-	-	-	-	-	-	-	-	-	-	-	-	-	-
			463	0.4826	-	-	-	-	-	-	-	-	-	-	-	-	-	-	-	-	-	-	-	-	-	-	-	-	-	-	-	-	-	-	-	-	-	-
			480	0.4114	-	-	-	-	-	-	-	-	-	-	-	-	-	-	-	-	-	-	-	-	-	-	-	-	-	-	-	-	-	-	-	-	-	-
TR67	III	351	272	13.2002	272	23.3938	272	19.5274	272	19.2801	272	23.1474	272	16.6805	272	19.599	272	29.1028	272	24.3458	272	24.9969	272	22.694	272	16.4592	272	11.4071	272	22.2022	272	20.6079	272	27.9458	272	14.1541	272	15.613
			338	4.8589	-	-	-	-	-	-	-	-	-	-	-	-	-	-	-	-	-	-	-	-	-	-	-	-	-	-	-	-	-	-	-	-	-	-
			359	7.4151	359	15.9793	359	11.4942	359	16.1962	359	19.3036	359	12.4311	359	18.2124	359	22.3947	359	18.4209	359	17.7798	359	14.5725	359	16.4434	359	5.771	359	20.4617	359	18.8427	359	18.5535	359	11.3193	359	10.7659
			432	2.5456	-	-	-	-	-	-	-	-	-	-	-	-	-	-	-	-	-	-	-	-	-	-	-	-	-	-	-	-	-	-	-	-	-	-
			449	0.8059	-	-	-	-	-	-	-	-	-	-	-	-	-	-	-	-	-	-	-	-	-	-	-	-	-	-	-	-	-	-	-	-	-	-
TR82	III	329	-	-	-	-	-	-	-	-	-	-	-	-	-	-	-	-	-	-	-	-	-	-	-	-	-	-	-	-	-	-	-	-	-	-	-	-
			333	12.4983	333	15.9371	333	10.3878	333	11.7308	333	10.4252	333	10.5454	333	12.8545	333	17.0828	333	19.0676	333	10.9964	333	17.5348	333	15.5836	333	14.058	333	13.8471	333	15.4537	333	8.6669	333	13.0307	333	9.3936
TR85	III	n.i.	217	8.554	217	10.8577	217	5.5905	217	9.6645	217	12.3082	217	10.6348	217	10.0431	217	6.9576	217	15.9686	217	9.1227	217	10.172	217	12.6737	217	11.5241	217	12.0026	217	10.9919	217	13.5874	217	10.5654	217	9.2545
			224	4.5521	224	9.4622	224	5.1898	224	8.7165	224	9.1562	224	8.4411	224	8.7603	224	7.0639	224	10.4	224	7.2406	224	8.3181	224	9.828	224	8.7112	224	10.6964	224	9.263	224	11.3725	224	9.0491	224	8.4279
			239	0.4154	-	-	-	-	-	-	-	-	-	-	-	-	-	-	-	-	-	-	-	-	-	-	-	-	-	-	-	-	-	-	-	-	-	-
			244	0.6605	-	-	-	-	-	-	-	-	-	-	-	-	-	-	-	-	-	-	-	-	-	-	-	-	-	-	-	-	-	-	-	-	-	-
			255	0.6441	-	-	-	-	-	-	-	-	-	-	-	-	-	-	-	-	-	-	-	-	-	-	-	-	-	-	-	-	-	-	-	-	-	-
			264	0.4678	-	-	-	-	-	-	-	-	-	-	-	-	-	-	-	-	-	-	-	-	-	-	-	-	-	-	-	-	-	-	-	-	-	-
TR4	III	266,271,281	244	2.1435	244	3.206	244	2.6233	244	3.4621	244	3.4762	244	2.6662	244	6.678	244	3.499	244	2.4852	244	2.3996	244	3.016	244	3.3592	244	1.948	244	5.4754	244	3.9476	244	2.7414	244	4.4661	244	7.0598
			289	1.1016	289	3.1772	289	1.6793	289	2.8552	289	2.1885	289	2.0033	289	3.4204	289	2.915	289	6.3348	289	1.8639	289	2.5975	289	2.5135	289	1.4914	289	5.1668	289	2.8185	289	1.9578	289	2.2485	289	2.8425
			321	0.5418	-	-	-	-	-	-	-	-	-	-	-	-	-	-	-	-	-	-	-	-	-	-	-	-	-	-	-	-	-	-	-	-	-	-
TR76	III	179	288	2.1727	288	1.4618	288	1.0897	288	1.2645	288	2.1469	288	1.5834	288	1.4717	288	1.5761	288	1.8282	288	1.4317	288	1.4839	288	1.5624	288	1.7498	288	1.4108	288	2.6311	288	2.0535	288	1.9006	288	1.596
			296	6.5967	296	4.6264	296	3.3817	296	4.2139	296	6.9813	296	4.7618	296	4.5668	296	4.7428	296	5.5321	296	4.4108	296	4.3063	296	4.5115	296	5.8642	296	4.1167	296	8.0544	296	6.3312	296	5.7689	296	4.7358
			303	2.7477	303	2.8185	303	2.3144	303	2.4677	303	4.3562	303	4.5452	303	4.0085	303	2.5653	303	3.1899	303	2.831	303	2.4539	303	2.6949	303	3.5287	303	2.2462	303	3.9184	303	3.6275	303	3.6245	303	2.8911
4C	IV	385	389	1.3236	389	2.1462	389	0.6018	389	1.3968	389	1.7903	389	2.025	389	1.1295	389	2.2398	389	2.1552	389	2.7578	389	2.402	389	1.5603	389	1.4093	389	2.7553	389	3.2759	389	1.3187	389	1.7518	389	2.1639
			397	1.8508	397	2.6777	397	1.0104	397	1.7497	397	2.0527	397	2.6119	397	1.7298	397	2.5661	397	2.1267	397	2.9996	397	1.7857	397	1.4029	397	2.0509	397	3.0495	397	3.4567	397	1.7206	397	2.0508	397	2.1663
			406	1.2067	406	1.9107	406	0.6456	406	1.3046	406	1.5926	406	1.9291	406	1.1498	406	2.0143	406	1.8761	406	2.1094	406	1.3192	406	1.038	406	1.4364	406	2.3534	406	2.8792	406	1.2352	406	1.5285	406	1.7414
			439	0.2639	-	-	-	-	-	-	-	-	-	-	-	-	-	-	439	0.4916	-	-	-	-	-	-	-	-	-	-	-	-	-	-	-	-	-	-
			450	0.1506	-	-	-	-	-	-	-	-	-	-	-	-	-	-	450	0.1452	-	-	-	-	-	-	-	-	-	-	-	-	-	-	-	-	-	-
765452	IV	354	318	4.0886	318	13.3724	318	6.9634	318	4.1252	318	4.2218	318	6.6853	318	23.8284	318	19.1983	318	12.1228	318	4.3896	318	3.6352	318	23.2836	318	11.1073	318	10.904	318	25.1194	318	24.669	318	19.3542	318	13.8104
			329	3.5299	329	4.2919	329	8.8038	329	3.7581	329	6.5556	329	2.7327	329	9.1917	329	7.0014	329	8.8671	329	2.9456	329	5.8872	329	10.093	329	5.209	329	5.4979	329	10.2929	329	4.3446	329	10.0615	329	9.4326
			389	0.7428	-	-	-	-	-	-	-	-	-	-	-	-	-	-	389	1.9531	389	0.8235	-	-	-	-	-	-	-	-	-	-	-	-	-	-	-	-
770094	IV	537	435	0.6793	435	0.4775	435	0.2398	435	0.3783	435	0.4373	435	0.3178	435	1.3159	435	1.256	435	0.6208	435	0.1229	435	0.3104	435	1.3397	435	0.6457	435	1.3892	-	-	435	0.1	435	0.5807	435	0.2917
			455	0.094	-	-	-	-	-	-	-	-	-	-	-	-	-	-	455	0.1001	-	-	-	-	-	-	-	-	-	-	-	-	-	-	-	-	-	-
			461	0.1119	-	-	-	-	-	-	-	-	-	-	-	-	-	-	461	0.1275	-	-	-	-	-	-	-	-	-	-	-	-	-	-	-	-	-	-
760004	IV	781	785	2.745	785	9.8983	785	0.9792	785	6.6147	785	3.4721	785	3.8157	785	7.972	785	3.7295	785	6.488	-	-	785	2.7773	785	8.2517	785	1.6073	785	10.533	785	4.2919	785	3.2361	785	3.5216	785	2.1244
			997	0.3409	-	-	-	-	-	-	-	-	-	-	-	-	-	-	997	1.2006	-	-	-	-	-	-	-	-	-	-	-	-	-	-	-	-	-	-
TR114	IV	>500	635	0.9906	635	1.8552	635	0.9476	635	0.5618	635	0.6297	635	0.778	635	3.5813	635	0.5017	635	1.6281	635	1.0746	635	1.6249	635	1.6741	635	0.543	635	0.6452	635	1.2046	635	1.3747	635	1.0723	635	1.4213
TR116	IV	n.i.	461	13.2793	461	14.3261	461	12.0462	461	15.0299	461	21.2673	461	20.9616	461	16.4243	461	17.1169	461	15.4426	461	23.1317	461	17.4557	461	26.5693	461	16.32	461	31.3686	461	26.8791	461	21.1271	461	19.9898	461	25.705
TR638	IV	n.i.	177	37.3744	177	40.2601	177	29.929	177	34.9945	177	49.625	177	43.6847	177	46.9273	177	38.4881	177	41.1093	177	569.258	177	50.4896	177	45.8783	177	55.9784	177	60.9443	177	55.4016	177	39.1476	177	51.1899	177	44.9972
TR634	IV	n.i.	252	16.043	252	19.9402	252	9.188	252	13.2194	252	15.3891	252	18.719	252	24.6793	252	18.0831	252	24.8266	252	17.7359	252	23.2301	252	23.013	252	16.3754	252	23.9235	252	16.2512	252	11.502	252	10.1124	252	10.2254
771467	IV	274	285	6.0633	285	13.8553	285	15.8649	285	18.5785	285	23.8782	285	25.489	285	22.7529	285	20.9648	285	8.1392	285	20.348	285	14.004	285	21.6218	285	24.4826	285	21.4691	285	20.0685	285	13.9836	285	23.0549	285	23.9241
			291	8.3341	-	-	-	-	-	-	-	-	-	-	-	-	-	-	291	10.6999	-	-	-	-	-	-	-	-	-	-	-	-	-	-	-	-	-	-
			385	7.8161	-	-	-	-	-	-	-	-	-	-	-	-	-	-	385	10.699	-	-	-	-	-	-	-	-	-	-	-	-	-	-	-	-	-	-
TR118	IV	n.i.	492	3.0968	492	8.2059	492	0.6915	492	3.4937	492	5.1873	492	4.0102	492	6.8694	492	4.5957	492	4.7174	492	2.1444	492	4.4743	492	7.0509	492	2.1	492	9.6905	492	3.4718	492	1.7536	492	2.7719	492	2.8006
TR647	IV	n.i.	309	4.9657	309	6.6421	309	4.3165	309	6.1681	309	4.8728	309	5.591	309	4.9922	309	4.7488	309	2.6063	309	3.3577	309	5.991	309	4.7127	309	7.5041	309	5.2239	309	3.4783	309	4.8359	309	5.135	309	5.207
			314	21.3162	314	14.4501	314	11.4728	314	15.693	314	14.0663	314	14.6433	314	11.2734	314	13.1133	314	13.2151	314	9.6538	314	16.845	314	13.0528	314	19.5238	314	13.2406	314	9.7387	314	11.0164	314	14.8029	314	14.0035
TR119	IV	n.i.	648	1.7005	648	2.6467	648	0.3855	648	2.5492	648	1.1039	648	1.1026	648	3.4385	648	1.9533	648	3.4361	648	1.4284	648	1.3284	648	3.5526	648	1.3717	648	3.3154	648	2.5848	648	1.897	648	2.0688	648	1.4842
			662	0.5439	662	0.6388	662	0.109	662	1.5551	662	0.5927	662	0.5455	662	1.7812	662	0.5088	662	0.9742	662	0.6065	662	0.4275	662	1.5796	662	0.6405	662	1.4561	662	1.1313	662	0.728	662	0.7539	662	0.3542
771529	IV	n.i.	353	6.362	353	5.8734	353	2.071	353	4.4304	353	4.8867	353	6.1163	353	7.1082	353	6.6221	353	8.6269	353	6.5554	353	6.0072	353	9.0788	353	8.0276	353	10.2395	353	5.2091	353	2.4018	353	7.603	353	7.317
TR133	IV	n.i.	690	0.9776	690	1.776	690	0.4418	690	1.6815	690	1.9209	690	1.8107	690	2.4467	690	2.6032	690	3.1594	690	2.7641	690	1.0558	690	2.5653	690	1.3782	690	3.8661	690	1.7534	690	1.0865	690	1.6131	690	1.4021
TR131	IV	356	356	3.3693	356	3.9262	356	2.9945	356	4.1817	356	7.1693	356	2.6672	356	5.997	356	7.3606	356	6.4741	356	3.3661	356	4.0403	356	5.2785	356	4.6187	356	6.8768	356	6.5865	356	3.0339	356	5.7041	356	4.8711
			363	1.81	-	-	-	-	-	-	-	-	-	-	-	-	-	-	363	3.0533	363	1.2545	-	-	-	-	-	-	-	-	-	-	-	-	-	-	-	-
TR764	V	214	203	3.5222	203	3.708	203	2.2416	203	4.2466	203	3.6879	203	3.7985	203	5.2674	203	4.3833	203	4.2409	203	3.7263	203	5.3445	203	5.6825	203	2.3318	203	3.6191	203	5.5522	203	2.4268	203	4.0845	203	2.3298
			214	5.687	214	7.8983	214	5.4013	214	9.3942	214	8.0584	214	7.8043	214	11.5317	214	8.6675	214	8.7485	214	7.3287	214	10.2382	214	11.5907	214	7.9557	214	7.9566	214	11.8847	214	5.0212	214	8.0149	214	5.2103
			225	1.5989	225	2.0277	225	1.1647	225	2.3508	225	2.1262	225	1.9149	225	2.5242	225	1.8336	225	2.0753	225	1.3836	225	1.4751	225	3.1575	225	1.0455	225	2.0088	225	3.1565	225	1.7732	225	2.0919	225	1.9317
			-	-	-	-	-	-	-	-	-	-	-	-	-	-	-	-	-	-	-	-	-	-	-	-	-	-	-	-	-	-	-	-	-	-	-	-
			-	-	-	-	-	-	-	-	-	-	-	-	-	-	-	-	-	-	-	-	-	-	-	-	-	-	-	-	-	-	-	-	-	-	-	-
764126	V	316	266	0.5335	-	-	-	-	-	-	-	-	-	-	-	-	-	-	-	-	-	-	266	0.798	-	-	266	0.2524	-	-	-	-	-	-	-	-	-	-
			275	1.7782	-	-	-	-	-	-	-	-	-	-	-	-	-	-	-	-	-	-	275	2.7509	-	-	275	0.9537	-	-	-	-	-	-	-	-	-	-
			291	4.3666	291	14.0323	291	34.9092	291	34.9092	291	7.8741	291	4.8967	291	10.2087	291	8.331	291	13.1554	291	12.5112	291	2.5021	291	9.1963	291	5.9424	291	4.6115	291	7.0074	291	5.4184	291	5.8654	291	13.2848
TR128	V	214	205	0.1809	205	0.3546	205	0.1842	205	0.2646	205	0.2915	205	0.507	205	0.674	205	0.5251	205	0.3483	205	0.3307	205	0.3094	205	0.66	205	0.2098	205	0.3965	205	0.3194	205	0.2151	205	0.4042	205	0.3045
			211	0.6711	211	0.7497	211	0.4451	211	0.3026	211	0.6141	211	1.0114	211	1.3654	211	1.0637	211	1.0332	211	0.9337	211	0.892	211	1.2846	211	0.5363	211	0.8231	211	0.6682	211	0.4379	211	0.8139	211	0.5884
			256	0.1211	256	0.2176	256	0.0998	256	0.1085	256	0.1924	256	0.2282	256	0.4065	256	0.3112	256	0.2085	256	0.2046	256	0.179	256	0.3729	256	0.0817	256	0.275	256	0.1809	256	0.1396	256	0.1899	256	0.113
			261	0.3114	261	0.5629	261	0.3026	261	0.2694	261	0.4589	261	0.5985	261	1.008	261	0.7161	261	0.5441	261	0.504	261	0.4504	261	0.8582	261	0.27	261	0.6723	261	0.4685	261	0.3674	261	0.5	261	0.3267
762599	V	295	301	6.1449	301	12.8893	301	5.9881	301	3.3921	301	8.3854	301	12.9048	301	6.5462	301	10.3456	301	9.0498	301	12.9503	301	7.6366	301	12.1545	301	11.1717	301	9.8406	301	11.4733	301	7.5421	301	13.345	301	15.3376
			309	9.9909	309	22.9125	309	9.0923	309	9.4843	309	12.5825	309	18.1177	309	14.7957	309	13.5316	309	12.4474	309	20.4953	309	11.5751	309	18.2401	309	19.4173	309	13.6386	309	18.0764	309	11.7347	309	19.2919	309	21.4287
749645	V	383	311	0.6819	-	-	-	-	-	-	-	-	-	-	-	-	-	-	-	-	-	-	311	0.8523	-	-	311	0.827	-	-	-	-	-	-	-	-	-	-
			345	0.1697	345	0.8593	345	0.4482	345	1.0616	345	1.0509	345	1.4	345	1.5273	345	1.5199	345	2.3276	345	1.8564	345	1.1759	345	2.1606	345	2.6666	345	1.3891	345	0.8828	-	-	-	-	345	1.2271
			350	1.1602	-	-	-	-	-	-	-	-	-	-	-	-	-	-	-	-	-	-	350	0.2978	-	-	350	0.3142	-	-	-	-	350	0.739	350	1.8061	-	-
			381	0.0384	-	-	-	-	-	-	-	-	-	-	-	-	-	-	-	-	-	-	381	0.1797	-	-	381	0.2041	-	-	-	-	-	-	-	-	-	-
			399	0.1722	-	-	-	-	-	-	-	-	-	-	-	-	-	-	-	-	-	-	-	-	-	-	-	-	-	-	-	-	399	0.1713	399	0.5579	-	-
			410	0.3014	-	-	-	-	-	-	-	-	-	-	-	-	-	-	-	-	-	-	410	0.0999	-	-	410	0.2684	-	-	-	-	-	-	-	-	-	-
			429	0.1319	-	-	-	-	-	-	-	-	-	-	-	-	-	-	-	-	-	-	429	0.0526	-	-	429	0.2167	-	-	-	-	-	-	-	-	-	-
TR513	V	n.i.	232	15.8703	232	22.2111	232	13.2381	232	26.4338	232	25.5977	232	23.7824	232	35.0319	232	22.8145	232	35.7641	232	16.162	232	17.5753	232	26.3248	232	16.3104	232	26.844	232	14.2298	232	18.3163	232	23.941	232	19.6583
			259	0.4303	-	-	-	-	-	-	-	-	-	-	-	-	-	-	-	-	-	-	259	0.5788	-	-	259	0.2861	-	-	-	-	-	-	-	-	-	-
			295	0.498	-	-	-	-	-	-	-	-	-	-	-	-	-	-	-	-	-	-	295	0.5284	-	-	295	0.4435	-	-	-	-	-	-	-	-	-	-
			352	0.7626	-	-	-	-	-	-	-	-	-	-	-	-	-	-	-	-	-	-	352	0.63	-	-	352	0.2967	-	-	-	-	-	-	-	-	-	-
TR512	V	n.i.	230	4.8797	230	3.0754	230	3.0118	230	3.337	230	2.0193	230	3.1812	230	4.2128	230	2.5003	230	4.3479	230	3.8637	230	3.8821	230	5.0402	230	1.5547	230	3.2905	230	2.503	230	1.0054	230	3.5723	230	3.7872
			236	5.253	236	3.5858	236	2.89	236	3.8607	236	2.3617	236	3.2832	236	4.7167	236	2.7424	236	5.1478	236	3.5605	236	4.9594	236	5.2627	236	1.7919	236	3.1931	236	2.4391	236	1.1384	236	3.4222	236	3.9204
			240	5.8199	240	3.3018	240	3.1526	240	3.2089	240	2.0407	240	3.12	240	4.5445	240	2.6096	240	4.9072	240	3.3986	240	5.0916	240	5.119	240	2.0026	240	3.2341	240	2.0851	240	1.0103	240	2.989	240	3.9824
TR759	V	n.i.	335	5.9252	335	2.8755	335	2.7725	335	2.9435	335	4.154	335	2.373	335	4.1757	335	2.7389	335	7.566	335	5.943	335	2.3553	335	4.2578	335	2.2527	335	6.5285	335	1.7842	335	1.6939	335	2.1837	335	4.4068
			349	0.6207	-	-	-	-	-	-	-	-	-	-	-	-	-	-	349	1.0378	-	-	-	-	-	-	-	-	-	-	-	-	-	-	-	-	-	-
			363	0.4671	-	-	-	-	-	-	-	-	-	-	-	-	-	-	363	1.2275	-	-	-	-	-	-	-	-	-	-	-	-	-	-	-	-	-	-
TR766	V	n.i.	280	28.2722	280	21.5379	280	16.364	280	15.2729	280	16.1235	280	18.0677	280	22.6222	280	19.9646	280	19.4403	280	17.7945	280	23.4913	280	29.6322	280	24.1229	280	25.8052	280	20.2398	280	13.9337	280	18.2136	280	33.1169
TR757	V	187	198	4.621	198	11.9065	198	5.8475	198	7.6333	198	8.4689	198	10.8536	198	7.7409	198	8.5748	198	10.8559	198	9.1956	198	7.309	198	8.5036	198	11.121	198	13.4405	198	11.6549	198	8.8895	198	10.1154	198	10.833
			220	0.1721	-	-	-	-	-	-	-	-	-	-	-	-	-	-	-	-	-	-	220	0.2691	-	-	220	0.3113	-	-	-	-	-	-	-	-	-	-
			237	0.8093	237	1.5186	237	0.7931	237	1.0406	237	1.3741	237	1.7308	237	1.7213	237	1.3233	237	1.5425	237	1.3572	237	1.2281	237	1.1225	237	1.772	237	1.9208	237	1.494	237	1.171	237	1.3649	237	1.6201
			245	0.7862	245	1.6792	245	0.7551	245	1.1203	245	1.2024	245	1.4647	245	1.1391	245	1.2096	245	1.5595	245	1.2301	245	1.1723	245	1.1957	245	1.3752	245	2.0426	245	1.4274	245	1.2048	245	1.2423	245	1.243
TR514	V	n.i.	242	3.988	242	6.9819	242	4.6082	242	3.888	242	2.2842	242	5.241	242	6.4963	242	5.4039	242	4.6936	242	6.4552	242	7.1415	242	7.3868	242	6.8498	242	6.5524	242	8.263	242	5.5946	242	7.3491	242	5.919
			253	2.0601	253	6.5755	253	2.5452	253	1.3722	253	1.3862	253	2.7307	253	3.6872	253	2.6989	253	2.4042	253	3.9577	253	3.9919	253	3.4879	253	3.7706	253	4.1974	253	3.3053	253	3.4597	253	3.9739	253	3.3696
717465	V	n.i.	261	12.3436	261	12.3701	261	9.7317	261	20.6748	261	15.9899	261	17.3161	261	16.1365	261	16.1804	261	15.6309	261	14.0895	261	14.0651	261	14.9933	261	14.3103	261	16.758	261	17.1522	261	15.1592	261	19.6987	261	16.3349
TR471	V	209	268	2.4814	268	2.549	268	1.2163	268	1.7955	268	3.7508	268	2.1831	268	2.2293	268	2.5361	268	2.8863	268	3.3714	268	1.7819	268	2.5159	268	5.1184	268	2.3669	268	2.7172	268	1.3555	268	2.972	268	1.96
			279	1.7174	279	3.2569	279	1.5816	279	2.5314	279	4.4385	279	3.0179	279	3.0321	279	3.2083	279	3.8374	279	4.2483	279	1.897	279	3.0504	279	6.2202	279	3.1708	279	3.6479	279	2.2093	279	3.7096	279	2.8917
			289	2.0706	289	2.225	289	0.9488	289	1.9208	289	3.4201	289	2.1206	289	2.129	289	2.1688	289	2.584	289	2.1317	289	1.802	289	2.3734	289	3.2203	289	2.1655	289	2.4007	289	2.1765	289	2.2274	289	3.0363
			340	0.0282	-	-	-	-	-	-	-	-	-	-	-	-	-	-	-	-	-	-	340	0.0236	340	0.0516	-	-	-	-	-	-	-	-	-	-	-	-
			350	0.0265	-	-	-	-	-	-	-	-	-	-	-	-	-	-	-	-	-	-	350	0.0265	350	0.0405	-	-	-	-	-	-	-	-	-	-	-	-
TR451	V	192/262	257	0.937	257	0.9233	257	0.3146	257	1.3361	257	0.6447	257	1.155	257	1.8652	257	1.9838	257	1.874	257	0.7236	257	0.603	257	2.0885	257	1.1532	257	1.4842	257	0.7387	257	0.6616	257	2.5164	257	1.0586
			266	1.0702	266	0.5397	266	0.4951	266	0.9929	266	0.4341	266	0.4414	266	1.1481	266	1.0666	266	1.2663	266	0.6109	266	0.8089	266	1.2399	266	1.3537	266	1.6492	266	1.2775	266	0.6194	266	3.3221	266	1.6079
			310	0.0268	-	-	-	-	-	-	-	-	310	0.05	-	-	310	0.0324	-	-	-	-	-	-	-	-	-	-	310	0.0612	-	-	-	-	-	-	-	-
			320	0.0779	-	-	-	-	-	-	-	-	320	0.1593	-	-	320	0.1186	-	-	-	-	-	-	-	-	-	-	320	0.178	-	-	-	-	-	-	-	-
TR90	VI	290	272	3.243	272	3.9786	272	4.6254	272	3.8421	272	3.4954	272	3.8241	272	3.0597	272	3.1542	272	3.5291	272	4.6338	272	4.0962	272	4.6669	272	4.4656	272	2.8909	272	2.7316	272	4.7485	272	4.101	272	2.7796
			291	1.5732	291	1.771	291	2.0952	291	1.4324	291	1.9268	291	1.9851	291	1.5699	291	1.2845	291	1.7427	291	2.1019	291	2.2977	291	2.5978	291	1.6626	291	1.5184	291	1.1755	291	2.2478	291	1.9909	291	1.8973
			301	2.9319	301	2.9483	301	2.6039	301	1.818	301	2.3587	301	2.3137	301	1.7	301	1.7502	301	2.3961	301	3.4386	301	3.1159	301	3.184	301	2.1721	301	2.9506	301	2.3861	301	2.495	301	2.8518	301	2.1325
			310	0.6629	-	-	-	-	-	-	-	-	-	-	-	-	-	-	-	-	-	-	-	-	-	-	-	-	310	0.7988	310	0.5497	-	-	-	-	-	-
			418	0.2635	-	-	-	-	-	-	-	-	-	-	-	-	-	-	-	-	-	-	-	-	-	-	-	-	418	0.3158	418	0.2335	-	-	-	-	-	-
			423	0.2513	-	-	-	-	-	-	-	-	-	-	-	-	-	-	-	-	-	-	-	-	-	-	-	-	423	0.3128	423	0.201	-	-	-	-	-	-
TR91	VI	287	333	0.543	333	0.5446	333	0.4251	333	0.5371	333	0.7307	333	0.7682	333	1.2594	333	0.8779	333	0.7853	333	0.7666	333	0.7813	333	0.941	333	0.3668	333	0.7048	333	0.8221	333	1.192	333	1.2058	333	1.1866
			343	1.0589	343	0.969	343	0.6818	343	1.0481	343	1.4261	343	1.2792	343	2.0409	343	1.4594	343	1.4074	343	1.0999	343	1.0971	343	1.6557	343	0.6276	343	1.4395	343	1.2651	343	2.1654	343	2.0192	343	1.9602
			353	0.9421	353	0.5288	353	0.3697	353	0.6668	353	0.87	353	0.7444	353	1.0657	353	0.7661	353	0.9239	353	0.4908	353	0.4531	353	1.0503	353	0.3444	353	1.464	353	1.1134	353	1.2351	353	1.0513	353	1.1595
			368	0.3849	-	-	-	-	-	-	-	-	-	-	-	-	-	-	-	-	-	-	-	-	-	-	-	-	368	0.1154	368	0.4199	-	-	-	-	-	-
			380	0.1153	-	-	-	-	-	-	-	-	-	-	-	-	-	-	-	-	-	-	-	-	-	-	-	-	380	0.4351	380	0.1433	-	-	-	-	-	-
747871	VI	705	733	2.3929	733	2.0313	733	0.1502	733	2.0685	733	1.1364	733	2.6555	733	3.0342	733	0.8445	733	3.7988	733	1.1042	733	2.6967	733	4.6478	733	0.8641	733	3.124	733	2.5993	733	1.3062	733	2.926	733	2.716
			775	0.2521	-	-	-	-	-	-	-	-	-	-	-	-	-	-	-	-	-	-	-	-	-	-	-	-	775	0.5422	775	0.2729	-	-	-	-	-	-
			789	0.4823	-	-	-	-	-	-	-	-	-	-	-	-	-	-	-	-	-	-	-	-	-	-	-	-	789	1.1143	789	0.2365	-	-	-	-	-	-
756538	VI	293	266	0.9134	266	1.4755	266	0.5239	266	0.6261	266	2.5971	266	1.2523	266	2.3289	266	1.0972	266	0.7979	266	0.8348	266	0.617	266	2.5426	266	2.4383	266	0.6942	266	1.2381	266	0.626	266	0.668	266	0.864
			360	0.1173	360	1.6544	360	0.1441	360	0.6355	360	0.7636	360	1.1003	360	1.2525	360	0.4645	360	0.8489	360	0.4234	360	0.1051	360	1.0947	360	3.5041	360	1.6799	360	0.6144	360	0.2067	360	0.4286	360	0.8517
749072	VI	304	293	10.0844	293	14.9472	293	10.0844	293	7.7974	293	11.8247	293	7.7409	293	9.813	293	5.8311	293	12.7419	293	8.5502	293	12.5174	293	9.4269	293	12.1036	293	12.7966	293	13.2923	293	6.1332	293	14.2587	293	12.9995
741435	VI	789	390	0.7289	390	0.3219	390	0.0324	390	0.2054	390	0.4001	390	0.4283	390	0.3896	390	0.1592	390	0.3804	390	0.0854	390	0.1193	390	0.3835	390	0.0108	390	0.0742	390	0.3492	390	0.0931	390	0.0514	390	0.0127
			507	0.1198	-	-	-	-	-	-	-	-	-	-	-	-	-	-	507	0.3312	-	-	-	-	-	-	-	-	-	-	-	-	-	-	-	-	-	-
BE446153	VI	n.i.	285	7.2514	285	8.2583	285	4.6295	285	9.1289	285	6.9074	285	8.2836	285	4.8895	285	8.7462	285	4.9277	285	4.127	285	4.9331	285	6.0646	285	6.7593	285	10.4039	285	4.7384	285	4.7489	285	10.8748	285	8.4811
			294	4.0335	294	4.644	294	2.7872	294	5.0373	294	3.8182	294	4.5105	294	2.251	294	4.894	294	2.6526	294	2.2723	294	2.9389	294	3.4462	294	4.1018	294	5.4209	294	2.1974	294	2.3202	294	6.1488	294	4.6819
BE445667	VI	n.i.	248	16.6734	248	16.3243	248	18.8638	248	17.8812	248	17.8591	248	19.7885	248	28.4949	248	30.1605	248	28.4051	248	14.4589	248	28.4291	248	32.0815	248	34.4228	248	40.2134	248	33.6481	248	32.235	248	31.8036	248	23.5808
BE490226	VI	n.i.	458	5.7091	458	12.9095	458	8.7699	458	16.317	458	25.4895	458	10.0483	458	13.8161	458	5.2736	458	19.7404	458	12.4352	458	10.9599	458	11.0486	458	12.5268	458	9.7045	458	18.3868	458	16.3454	458	15.9792	458	11.3267
BE591696	VI	n.i.	203	7.0952	203	1.6722	203	1.5587	203	1.2611	203	1.5464	203	1.7585	203	1.6787	203	1.7821	203	2.7425	203	1.9099	203	2.1386	203	2.0868	203	1.1422	203	1.7224	203	1.4116	203	2.4545	203	1.097	203	1.9907
			216	10.9177	216	6.2201	216	6.535	216	4.8465	216	5.3541	216	6.508	216	6.4096	216	6.381	216	9.4275	216	6.9378	216	8.5759	216	7.2314	216	4.5367	216	6.2788	216	5.4466	216	9.709	216	4.6133	216	7.7317
			229	3.4788	229	2.1491	229	2.3137	229	2.0647	229	1.8957	229	2.1591	229	2.524	229	2.1566	229	3.3935	229	2.3915	229	3.0407	229	2.4775	229	2.1486	229	2.5782	229	2.0402	229	3.3969	229	2.1628	229	2.9826
BE426214	VI	n.i.	317	1.6477	317	3.2276	317	2.6931	317	2.0846	317	2.2149	317	2.0442	317	2.749	317	2.5928	317	3.7768	317	3.0815	317	1.7708	317	3.8247	317	3.6937	317	3.8523	317	3.2068	317	2.3082	317	3.6396	317	2.4715
			326	6.0327	326	11.5869	326	10.0555	326	7.7358	326	8.8776	326	7.9106	326	9.4283	326	8.8209	326	17.2756	326	10.9679	326	7.5889	326	15.8707	326	12.9778	326	13.6127	326	10.4712	326	10.4116	326	15.7357	326	9.5611
			333	2.4338	333	5.1999	333	4.4429	333	3.6258	333	4.2773	333	0.8408	333	4.2795	333	4.1657	333	1.9671	333	4.6634	333	0.6311	333	1.7288	333	5.757	333	1.0679	333	4.1379	333	0.9452	333	2.1957	333	1.1692
TR88	VI	407	416	2.8394	416	3.2714	416	0.8264	416	2.1292	416	2.3962	416	3.7082	416	4.4786	416	4.2529	416	5.8652	416	2.1444	-	-	416	5.205	416	4.4799	416	1.5894	416	1.2565	416	0.6358	416	2.4083	416	0.8663
			482	0.5913	-	-	-	-	-	-	-	-	-	-	-	-	-	-	-	-	-	-	-	-	-	-	-	-	482	1.4369	482	1.0443	-	-	-	-	-	-
			502	0.5366	-	-	-	-	-	-	-	-	-	-	-	-	-	-	-	-	-	-	-	-	-	-	-	-	502	1.2628	502	0.8705	-	-	-	-	-	-
TR103	VI	270	281	0.8388	281	1.7653	281	0.9045	281	1.8491	281	0.8501	281	1.6499	281	2.4819	281	1.1716	281	1.2746	281	1.1503	281	1.3577	281	1.0105	281	1.9215	281	3.9248	281	0.6253	281	0.5688	281	1.862	281	1.9517
			293	2.4197	293	4.5847	293	1.1167	293	2.4157	293	2.0069	293	2.1785	293	3.0639	293	3.1144	293	2.4228	293	3.0362	293	1.7355	293	2.4289	293	2.4545	293	3.7759	293	1.4765	293	1.4866	293	2.4105	293	2.5738
TR92	VI	231	212	2.0355	212	3.443	212	2.6588	212	2.9144	212	3.1187	212	4.3755	212	2.8336	212	3.3028	212	3.7787	212	4.3236	212	3.5335	212	5.1312	212	4.828	212	4.6815	212	3.4875	212	2.9991	212	4.3412	212	3.0973
			224	2.4743	224	3.5677	224	3.4835	224	3.7962	224	3.699	224	4.7194	224	3.7521	224	4.1463	224	4.9884	224	4.3458	224	3.586	224	5.0985	224	5.54	224	4.3016	224	4.3608	224	3.3387	224	4.8329	224	3.5166
			232	1.8202	-	-	-	-	-	-	-	-	-	-	-	-	-	-	-	-	-	-	-	-	-	-	-	-	232	4.0694	232	2.3264	-	-	-	-	-	-
			237	2.5611	237	3.0445	237	1.9485	237	2.4771	237	4.0999	237	3.6808	237	2.2764	237	4.6311	237	3.7722	237	2.7148	237	2.8568	237	6.3604	237	4.7256	237	5.4169	237	3.2986	237	2.8836	237	4.5847	237	2.8931
			244	2.0299	-	-	-	-	-	-	-	-	-	-	-	-	-	-	-	-	-	-	-	-	-	-	-	-	244	3.3268	244	2.6825	-	-	-	-	-	-
			249	2.3863	249	5.3586	249	3.5886	249	5.1772	249	4.8012	249	5.8535	249	4.1043	249	5.0573	249	6.8897	249	5.023	249	5.0935	249	7.1314	249	5.7547	249	4.596	249	3.8512	249	4.998	249	5.2478	249	4.8211
			308	0.7213	-	-	-	-	-	-	-	-	-	-	-	-	-	-	-	-	-	-	-	-	-	-	-	-	308	1.5187	308	0.8482	-	-	-	-	-	-
760549	VI	433	421	12.5401	421	5.6683	421	6.9013	421	13.866	421	11.2825	421	19.1242	421	15.3067	421	9.9034	421	11.1372	421	13.6352	421	14.6021	421	7.844	421	10.9632	421	19.0736	421	15.579	421	11.3657	421	13.5255	421	14.8717
			431	19.1198	431	6.516	431	9.8796	431	13.5645	431	12.3364	431	19.8937	431	17.6804	431	10.3973	431	10.9815	431	14.629	431	16.3909	431	7.8725	431	12.9214	431	21.3093	431	16.5114	431	11.483	431	12.6709	431	13.6915
739776	VI	423	370	12.1987	370	31.3869	370	24.0241	370	41.7641	370	30.6143	370	31.9247	370	38.2003	370	36.5115	370	21.2132	370	23.1373	370	28.9071	370	21.183	370	27.7293	370	38.4896	370	32.1415	370	31.9569	370	30.5456	370	25.4743
			381	12.4702	381	7.9847	381	7.3858	381	10.7057	381	8.4662	381	8.7258	381	11.098	381	9.3784	381	5.4603	381	4.5479	381	7.4884	381	4.3189	381	6.9952	381	10.2573	381	7.6821	381	9.0173	381	7.957	381	5.2248
			390	1.995	-	-	-	-	-	-	-	-	-	-	-	-	-	-	-	-	-	-	-	-	-	-	-	-	-	-	-	-	-	-	-	-	-	-
			397	11.8395	397	31.2746	397	19.5622	397	40.7255	397	25.472	397	32.2937	397	40.5624	397	30.6329	397	21.5214	397	21.6672	397	27.5599	397	23.054	397	24.0808	397	31.9395	397	27.116	397	31.4962	397	27.2894	397	18.7707
			409	2.133	409	6.4985	409	5.044	409	8.5928	409	6.103	409	7.5103	409	9.5913	409	6.9518	409	4.5292	409	4.0734	409	5.8832	409	4.6616	409	5.3068	409	6.9409	409	4.9533	409	7.1502	409	5.9792	409	3.9033
742079	VI	346	-	-	365	6.32	-	-	-	-	365	2.0621	365	2.6658	365	7.4684	365	3.1644	-	-	365	2.3264	365	0.9055	365	3.5551	365	0.7164	365	1.0464	365	6.9965	365	13.2899	365	6.1334	365	1.1263
			405	4.3237	-	-	-	-	-	-	-	-	-	-	-	-	-	-	-	-	-	-	-	-	-	-	-	-	-	-	-	-	-	-	-	-	-	-
725983	VI	263	161	5.0205	161	4.5838	161	3.4478	161	3.5217	161	4.1978	161	4.8193	161	3.3352	161	3.2496	161	5.0576	161	4.7298	161	4.6449	161	3.8171	161	6.4109	161	3.4388	161	4.7057	161	3.0592	161	5.2275	161	1.6411
			164	1.1085	-	-	-	-	-	-	-	-	-	-	-	-	-	-	-	-	-	-	-	-	-	-	-	-	-	-	-	-	-	-	-	-	-	-
			-	-	168	1.0714	168	0.799	168	0.8199	168	0.957	168	1.0725	168	0.7584	168	0.7447	168	1.3009	168	1.084	168	1.0631	168	0.8653	168	1.4958	168	0.7819	168	1.0515	168	0.7223	168	1.1928	168	0.3617
			174	2.0981	174	2.1552	174	1.826	174	1.541	174	1.7886	174	2.1392	174	1.8344	174	1.2817	174	2.2863	174	2.1098	174	1.813	174	1.6271	174	2.2854	174	1.8339	174	1.9656	174	1.6033	174	2.2226	174	0.714
736558	VI	601	550	66.6428	550	94.5762	550	70.3181	550	239.815	550	94.1607	550	93.4664	550	167.908	550	132.724	550	244.445	550	132.731	550	73.0133	550	54.2756	550	86.1531	550	70.6107	550	100.305	550	94.2818	550	88.504	550	124.767
744182	VI	745	720	10.6822	720	16.3974	720	26.0888	720	30.7558	720	16.1487	720	37.378	720	25.7312	720	33.8106	720	114.585	720	30.1683	720	21.6525	720	98.7643	720	14.7435	720	30.9533	720	31.6326	720	20.33	720	34.3461	720	24.0711
			770	15.6017	770	8.8005	770	18.2719	770	20.6557	770	9.2324	770	19.569	770	11.6266	770	13.075	770	57.6556	770	14.3281	770	11.298	770	55.2252	770	7.5697	770	13.899	770	16.5848	770	9.1252	770	21.1332	770	18.287
745905	VI	454	407	11.3145	407	9.394	407	10.4772	407	16.8213	407	16.5283	407	25.4182	407	8.2927	407	15.2591	407	16.8124	407	11.5668	407	11.1355	407	13.7892	407	7.903	407	9.8273	407	10.1021	407	16.2128	407	8.1267	407	9.3959
			422	11.9737	422	11.047	422	15.7912	422	14.0064	422	14.9627	422	25.2645	422	8.1313	422	14.3231	422	14.1026	422	9.825	422	11.5852	422	12.1974	422	8.0277	422	9.9641	422	12.0425	422	13.0051	422	6.8623	422	7.3465
			457	5.103	457	4.7049	457	4.9938	457	6.8628	457	6.5486	457	11.5084	457	3.7761	457	6.9289	457	7.15	457	4.7236	457	5.1016	457	6.1646	457	3.6834	457	4.8461	457	5.1353	457	6.2867	457	3.4802	457	3.7965
			466	5.4919	466	5.0981	466	5.2827	466	7.5706	466	7.2064	466	12.6788	466	4.1124	466	7.6177	466	7.7595	466	5.0674	466	5.5497	466	6.7107	466	4.0905	466	5.1524	466	5.5496	466	6.8197	466	3.7562	466	4.0235
753405	VI	392	335	14.3856	335	12.4109	335	8.7772	335	14.6891	335	13.9409	335	16.0539	335	12.1264	335	14.4502	335	14.8534	335	10.0704	335	14.023	335	11.0812	335	11.4149	335	9.4605	335	13.0291	335	9.6891	335	14.9126	335	13.7834
753982	VI	517	395	0.4739	-	-	-	-	-	-	-	-	-	-	-	-	-	-	395	0.7142	-	-	395	0.4163	395	1.0962	-	-	-	-	-	-	-	-	-	-	-	-
755465	VI	856	700	4.9203	700	5.1475	700	4.7068	700	5.7488	700	4.1767	700	3.6303	700	2.5465	700	4.3964	700	7.1523	700	5.3353	700	6.1709	700	5.9232	700	2.2616	700	5.4004	700	4.4819	700	3.5542	700	7.4712	700	4.3135
			790	0.4905	-	-	-	-	-	-	-	-	-	-	-	-	-	-	-	-	-	-	-	-	-	-	-	-	-	-	-	-	-	-	-	-	-	-
756643	VI	268	-	-	360	77.6984	360	51.4846	360	68.2799	360	72.8182	360	75.3674	360	71.9318	360	75.0177	360	86.7648	360	142.59	360	74.8795	360	74.4365	360	80.9316	360	76.548	360	82.3629	360	61.2939	360	78.7257	360	89.6123
			366	39.2407	-	-	-	-	-	-	-	-	-	-	-	-	-	-	-	-	-	-	-	-	-	-	-	-	-	-	-	-	-	-	-	-	-	-
			381	6.6961	-	-	-	-	-	-	-	-	-	-	-	-	-	-	-	-	-	-	-	-	-	-	-	-	-	-	-	-	-	-	-	-	-	-
			475	5.217	-	-	-	-	-	-	-	-	-	-	-	-	-	-	-	-	-	-	-	-	-	-	-	-	-	-	-	-	-	-	-	-	-	-
757249	VI	869	825	14.4319	825	13.4086	825	16.9055	825	14.1511	825	14.5713	825	23.0476	825	31.3626	825	17.2172	825	16.6505	825	27.2186	825	16.0176	825	15.4463	825	10.5021	825	7.8148	825	19.8673	825	22.2687	825	9.8707	825	17.5879
			1122	0.5484	-	-	-	-	-	-	-	-	-	-	-	-	-	-	-	-	-	-	-	-	-	-	-	-	-	-	-	-	-	-	-	-	-	-
760225	VI	337	251	0.4866	251	1.3625	251	0.3987	251	1.4288	251	1.0918	251	1.6991	251	2.5577	251	1.6302	251	1.8142	251	1.4712	251	0.5027	251	2.2881	251	1.2592	251	2.137	251	1.6965	251	0.6731	251	1.1254	251	1.6278
			257	0.6382	257	1.8529	257	0.7389	257	1.7408	257	1.5892	257	2.5278	257	3.6555	257	2.2812	257	2.5193	257	2.4034	257	0.781	257	3.0689	257	2.0534	257	2.784	257	2.209	257	0.9859	257	1.6625	257	2.3064
			261	0.9568	261	1.0699	261	0.345	261	0.8197	261	0.6931	261	1.015	261	1.4684	261	1.1313	261	1.1542	261	1.2403	261	0.4245	261	1.4889	261	0.76	261	1.3634	261	1.1979	261	0.506	261	0.8442	261	1.3518
			266	1.0981	266	1.1776	266	0.4653	266	0.7902	266	0.7411	266	1.1373	266	1.5158	266	1.2167	266	1.1881	266	1.5731	266	0.8607	266	1.5164	266	0.8914	266	1.3773	266	1.2539	266	0.5807	266	0.9584	266	1.5883
			349	0.1805	-	-	-	-	-	-	-	-	-	-	-	-	-	-	-	-	-	-	-	-	-	-	-	-	-	-	-	-	-	-	-	-	-	-
			354	0.1976	-	-	-	-	-	-	-	-	-	-	-	-	-	-	-	-	-	-	-	-	-	-	-	-	-	-	-	-	-	-	-	-	-	-
765143	VI	370	345	70.8231	345	17.8153	345	16.6107	345	22.3302	345	26.0294	345	25.0388	345	21.165	345	34.603	345	54.832	345	25.9038	345	25.3927	345	27.0589	345	16.8301	345	23.8852	345	22.0509	345	27.4758	345	19.3812	345	21.6078
			350	127.612	350	18.7236	350	20.9085	350	24.6864	350	30.6303	350	28.7654	350	26.4028	350	36.9353	350	15.8195	350	32.2534	350	33.5197	350	32.8352	350	18.3311	350	31.3643	350	27.6568	350	33.8059	350	24.8262	350	29.4928
			384	4.3008	-	-	-	-	-	-	-	-	-	-	-	-	-	-	-	-	-	-	-	-	-	-	-	-	-	-	-	-	-	-	-	-	-	-
			396	9.0548	-	-	-	-	-	-	-	-	-	-	-	-	-	-	-	-	-	-	-	-	-	-	-	-	-	-	-	-	-	-	-	-	-	-
766328	VI	423	255	49.429	255	58.2911	255	23.7167	255	40.0808	255	32.2138	255	27.0904	255	27.4264	255	51.937	255	54.7792	255	96.1867	255	36.1345	255	59.1933	255	57.7579	255	29.5803	255	43.8161	255	32.9122	255	29.1518	255	58.5606
817780	VI	270	275	4.3839	275	24.499	275	15.3654	275	31.8264	275	32.1538	275	31.9971	275	37.1279	275	34.8251	275	23.711	275	16.372	275	25.1529	275	36.4697	275	22.1426	275	30.9676	275	22.2604	275	18.7919	275	32.2623	275	35.2165
BM138382	VI	219	236	5.6236	236	6.0689	236	3.4461	236	6.9774	236	8.4719	236	6.3793	236	6.4344	236	7.1323	236	7.9317	236	5.4549	236	4.9791	236	8.3935	236	8.5918	236	8.189	236	8.8368	236	4.0379	236	7.2687	236	6.5024
			242	6.0887	242	7.1255	242	2.4617	242	8.0145	242	6.8111	242	4.5319	242	5.0173	242	7.305	242	9.229	242	3.9164	242	3.7706	242	8.2149	242	8.3237	242	7.5318	242	6.6101	242	2.5314	242	6.7916	242	5.5167
BE518349	VI	325	338	4.0967	338	14.4096	338	12.2682	338	14.8714	338	10.177	338	12.8556	338	13.4478	338	15.058	338	15.5141	338	11.9628	338	14.0247	338	19.9824	338	18.5016	338	11.5649	338	16.871	338	12.4577	338	14.2935	338	13.5051
			364	6.718	364	18.8603	364	9.6981	364	16.0443	364	13.8505	364	13.3438	364	20.0989	364	18.6959	364	14.7018	364	10.0263	364	15.9145	364	18.4967	364	15.3821	364	15.0013	364	23.5256	364	16.0847	364	14.2294	364	12.8015
			415	1.237	-	-	-	-	-	-	-	-	-	-	-	-	-	-	-	-	-	-	-	-	-	-	-	-	-	-	-	-	-	-	-	-	-	-
BE497126	VI	321	327	24.9299	327	6.256	327	2.9473	327	7.7374	327	5.6769	327	7.2448	327	9.2606	327	6.9262	327	6.7693	327	6.2404	327	8.853	327	6.4495	327	5.3866	327	5.4785	327	6.0963	327	5.49	327	5.8295	327	5.5948
			340	52.5529	340	16.1747	340	5.4562	340	19.6145	340	17.2025	340	18.0769	340	28.1556	340	19.0136	340	20.527	340	24.2481	340	20.8974	340	15.883	340	17.9355	340	18.9697	340	15.3549	340	15.5422	340	13.2697	340	16.3384
BE498099	VI	303	353	21.1913	353	11.4823	353	5.3883	353	10.7148	353	11.1012	353	12.3546	353	10.2408	353	14.6653	353	8.3171	353	16.9389	353	10.3234	353	16.678	353	15.8419	353	27.4321	353	32.5101	353	12.9885	353	8.1117	353	14.7214
			363	37.4626	363	20.7152	363	9.3392	363	16.2494	363	19.3866	363	20.2271	363	18.3037	363	20.7465	363	14.4008	363	24.6093	363	15.6991	363	27.0996	363	26.9272	363	51.1158	363	60.7793	363	16.4845	363	12.8579	363	21.6849
			371	4.1947	-	-	-	-	-	-	-	-	-	-	-	-	-	-	-	-	-	-	-	-	-	-	-	-	371	6.6579	371	8.0592	-	-	-	-	-	-
			377	2.5122	-	-	-	-	-	-	-	-	-	-	-	-	-	-	-	-	-	-	-	-	-	-	-	-	377	3.4444	377	4.4642	-	-	-	-	-	-
BE405680	VI	249	248	15.9129	248	27.2743	248	8.1363	248	23.0081	248	24.4684	248	15.3282	248	15.6197	248	22.1603	248	13.7388	248	15.1894	248	15.2137	248	18.1641	248	13.3065	248	17.1462	248	25.0672	248	13.0671	248	21.8689	248	14.7973
			265	12.4097	265	14.4795	265	7.1628	265	22.5019	265	16.8126	265	19.432	265	17.2641	265	24.8284	265	10.3336	265	11.2929	265	16.4996	265	26.3838	265	14.1338	265	15.4357	265	30.8205	265	15.2746	265	19.0326	265	19.084
TR93	VI	n.i.	487	26.1635	487	32.2582	487	7.9613	487	10.3779	487	29.9038	487	24.2803	487	20.845	487	26.4357	487	34.3879	487	30.5971	487	20.7745	487	26.806	487	26.3627	487	36.9552	487	31.4161	487	21.2425	487	22.6345	487	22.206
			502	2.751	-	-	-	-	-	-	-	-	-	-	-	-	-	-	-	-	-	-	-	-	-	-	-	-	502	3.6156	502	2.6769	-	-	-	-	-	-
			514	3.3179	514	8.5087	514	2.0184	514	27.5505	514	7.9828	514	7.9446	514	5.9887	514	8.3813	514	11.5789	514	6.8915	514	5.8673	514	8.5897	514	6.5301	514	6.3906	514	5.1965	514	6.5147	514	7.2388	514	6.4001
			570	1.9773	-	-	-	-	-	-	-	-	-	-	-	-	-	-	-	-	-	-	-	-	-	-	-	-	570	2.2754	570	2.0374	-	-	-	-	-	-
			588	4.8425	588	8.5414	588	2.1828	588	8.643	588	8.1854	588	7.6806	588	5.8689	588	8.2449	588	10.3346	588	6.3721	588	5.7162	588	8.3062	588	6.4384	588	8.6807	588	7.1339	588	6.3141	588	7.184	588	6.3054
TR97	VI	n.i.	240	9.9576	240	16.3836	240	7.4963	240	14.4663	240	13.5312	240	14.0178	240	14.4561	240	13.3046	240	16.5788	240	11.9232	240	12.1479	240	15.2249	240	12.1903	240	17.1717	240	11.9491	240	8.9109	240	16.4671	240	13.221
TR99	VI	n.i.	390	51.422	390	42.8307	390	21.199	390	26.7246	390	25.9038	390	47.5255	390	26.3558	390	26.9791	390	53.5071	390	48.7105	390	43.2315	390	64.2758	390	30.1295	390	51.9994	390	53.3064	390	20.6019	390	29.5968	390	24.0375
TR101	VI	n.i.	175	15.3148	175	17.9551	175	11.8505	175	21.9137	175	17.5818	175	18.3846	175	19.2491	175	17.5309	175	17.2337	175	16.518	175	15.3451	175	16.0078	175	17.9133	175	19.3973	175	18.6741	175	15.4664	175	17.4809	175	9.5004
			179	36.7161	179	38.1372	179	25.936	179	41.2801	179	37.7845	179	37.0848	179	40.5149	179	35.8957	179	40.6144	179	39.3583	179	35.2518	179	36.9323	179	37.9474	179	41.3443	179	40.1868	179	33.0836	179	38.4697	179	25.6538
TR102	VI	n.i.	305	10.4203	305	4.1424	305	1.5382	305	4.3163	305	3.7358	305	4.6544	305	2.4016	305	2.9571	305	4.5362	305	12.8988	305	6.1169	305	20.4731	305	3.6772	305	16.0481	305	11.6304	305	3.2053	305	2.5057	305	5.3716
			315	19.5326	315	29.7924	315	3.3245	315	20.5842	315	7.6402	315	11.4072	315	11.3741	315	17.6559	315	17.381	315	12.1892	315	9.3849	315	17.3675	315	12.5009	315	23.094	315	8.0003	315	3.7561	315	12.37	315	19.9212
TR104	VI	n.i.	416	3.2295	416	8.6132	416	2.0469	416	6.8627	416	4.8051	416	4.9356	416	4.0012	416	4.6777	416	4.6696	416	1.8515	416	4.041	416	5.9412	416	5.1774	416	5.3891	416	3.7365	416	3.8138	416	5.5539	416	3.0176
			438	5.2197	438	11.2374	438	2.5626	438	8.4299	438	6.5326	438	5.9601	438	5.5337	438	5.8481	438	5.0437	438	2.8491	438	5.5848	438	6.9337	438	6.8321	438	7.1149	438	4.5724	438	5.8922	438	6.7883	438	4.3744
TR105	VI	n.i.	267	8.0191	267	10.628	267	6.8734	267	9.4206	267	9.2858	267	9.3995	267	7.8557	267	8.7765	267	9.6793	267	10.1164	267	7.9946	267	9.1923	267	7.6314	267	8.1481	267	8.0677	267	8.164	267	10.5393	267	7.6703
			271	5.7897	271	6.9148	271	3.9877	271	5.7673	271	6.1842	271	5.8164	271	5.4181	271	5.3982	271	5.5372	271	6.4217	271	5.0775	271	5.2767	271	5.8436	271	5.4396	271	5.6618	271	5.2466	271	7.27	271	6.1453
			284	1.9766	284	2.6963	284	1.3939	284	2.3682	284	2.4317	284	2.4033	284	1.8829	284	2.3013	284	2.3398	284	3.3541	284	1.8714	284	2.1158	284	1.8653	284	2.0563	284	1.9939	284	2.0155	284	2.6552	284	1.8732
			290	2.4801	290	3.7681	290	2.0375	290	3.2306	290	3.396	290	3.2575	290	2.7054	290	3.0335	290	3.3486	290	1.1846	290	2.5554	290	2.9531	290	2.7214	290	2.7724	290	2.8666	290	2.7853	290	3.7551	290	2.6801
TR106	VI	n.i.	234	65.8627	234	102.832	234	47.5508	234	82.3332	234	74.5242	234	84.6525	234	76.8611	234	78.0664	234	92.2201	234	84.8455	234	68.3905	234	75.5076	234	72.9052	234	91.1318	234	100.334	234	75.9973	234	78.7501	234	7.8821
TR107	VI	n.i.	474	34.0917	474	48.6184	474	15.252	474	37.7959	474	20.2911	474	26.4794	474	28.3274	474	28.0394	474	36.5845	474	33.5774	474	34.0713	474	40.4334	474	25.1946	474	35.9246	474	33.876	474	24.1386	474	24.9145	474	21.7878
TR110	VI	n.i.	369	42.1547	369	43.2221	369	33.1208	369	54.2628	369	45.4735	369	28.2149	369	34.5133	369	42.8507	369	51.8985	369	44.7004	369	49.732	369	48.2035	369	38.9983	369	23.2451	369	42.6959	369	48.4742	369	41.1376	369	42.6369
TR112	VI	n.i.	414	6.4609	414	9.4399	414	6.5858	414	11.1189	414	7.9584	414	12.254	414	9.1073	414	8.4549	414	13.8124	414	10.1266	414	9.7386	414	8.3664	414	1.001	414	7.6161	414	10.4348	414	10.6633	414	10.7713	414	10.9367
BF202810	VI	n.i.	277	13.4287	277	76.7431	277	28.8286	277	73.9895	277	46.7586	277	59.6942	277	47.9221	277	46.3408	277	58.0384	277	81.8549	277	78.946	277	73.6579	277	44.2633	277	52.5997	277	81.7511	277	11.4641	277	60.5446	277	46.322
			316	1.3314	316	31.7646	316	6.5604	316	27.6445	316	15.8972	316	20.0331	316	16.7807	316	19.3158	316	22.8326	316	24.2222	316	26.1218	316	28.95	316	15.2755	316	18.5106	316	15.4674	316	13.7703	316	21.679	316	18.2437
BG313802	VI	n.i.	290	4.5054	290	5.1205	290	2.3171	290	10.1967	290	7.2097	290	8.9049	290	7.6453	290	8.9605	290	6.2034	290	8.2889	290	7.6507	290	3.4485	290	6.2091	290	2.6935	290	6.7157	290	6.5115	290	6.7849	290	6.7896
			330	17.5773	330	25.5927	330	7.9684	330	20.8837	330	23.0512	330	26.5148	330	36.4407	330	14.4853	330	17.3449	330	15.671	330	20.5903	330	21.0686	330	12.9301	330	12.3576	330	17.8051	330	18.8396	330	19.3732	330	18.0523
BE495143	VI	n.i.	327	30.7292	327	56.3521	327	8.0499	327	69.0955	327	56.4053	327	62.1918	327	76.3952	327	60.8484	327	71.0276	327	44.8586	327	28.8808	327	58.2476	327	52.0913	327	69.8286	327	45.9159	327	30.1251	327	53.9298	327	48.8712
7C	VII	328	342	2.9945	342	5.6802	342	2.2641	342	4.0541	342	3.3924	342	4.3716	342	3.4793	342	5.6054	342	4.1905	342	4.9404	342	5.6773	342	6.0304	342	4.7377	342	4.6607	342	4.0367	342	2.4496	342	4.2159	342	5.0571
			448	0.0834	-	-	-	-	-	-	-	-	-	-	-	-	-	-	-	-	-	-	-	-	-	-	-	-	-	-	-	-	447	0.0471	447	0.1002	-	-
753911	VII	285	141	0.7938	141	1.2937	141	0.6479	141	0.9721	141	1.2809	141	1.4158	141	1.1472	141	1.5848	141	1.9431	141	1.6155	141	1.6326	141	1.6512	141	1.4927	141	1.6099	141	1.9082	141	0.7451	141	1.4723	141	1.0374
			153	2.0177	153	1.9889	153	1.263	153	1.721	153	1.9598	153	2.1148	153	1.8884	152	2.3895	153	2.8274	153	2.4008	153	2.0163	153	2.1254	153	2.4405	153	2.1208	153	2.6184	153	1.9348	153	2.042	153	2.7508
			166	1.3598	-	-	-	-	-	-	-	-	-	-	-	-	-	-	-	-	-	-	-	-	-	-	-	-	-	-	-	-	166	1.3835	-	-	166	1.9125
754211	VII	330	298	4.8761	298	3.2049	298	2.1704	298	2.7785	298	2.7303	298	2.5442	298	2.7956	298	1.8606	298	7.7738	298	3.4971	298	5.5798	298	4.7577	298	3.21	298	2.1364	298	2.1813	298	1.7784	298	2.123	298	0.9421
			305	7.4619	305	6.8284	305	4.4889	305	5.9028	305	5.1979	305	4.9758	305	5.6726	305	4.0568	305	13.7596	305	5.9627	305	8.9836	305	8.3289	305	6.8762	305	4.6036	305	3.9839	305	3.665	305	4.7944	305	2.2499
TR355	VII	n.i.	247	9.4819	247	19.3093	247	14.9192	247	15.0333	247	18.2813	247	17.0729	247	17.3518	247	18.1299	247	16.2944	247	18.0701	247	23.3741	247	19.2902	247	18.3034	247	19.9265	247	18.4938	247	7.243	247	18.9856	247	17.8762
			252	6.8522	-	-	-	-	-	-	-	-	-	-	-	-	-	-	-	-	-	-	-	-	-	-	-	-	-	-	-	-	252	5.0988	252	17.7684	-	-
			259	5.5862	259	6.3877	259	4.4038	259	4.7391	259	5.1377	259	4.6069	259	4.7834	259	4.972	259	4.5845	259	5.065	259	6.526	259	6.0802	259	5.9836	259	5.7294	259	5.7361	259	3.3467	259	2.2185	259	5.2192
TR329	VII	n.i.	267	7.529	267	11.9959	267	6.379	267	8.7003	267	8.6478	267	7.9907	267	7.1995	267	7.6363	267	9.7044	267	10.6312	267	11.0078	267	10.1286	267	8.8991	267	12.7138	267	8.9447	267	7.0475	267	10.4488	267	8.4394
			276	32.6759	276	40.4256	276	23.958	276	32.0168	276	32.4697	276	32.7546	276	29.1069	276	32.3437	276	39.4341	276	40.0667	276	40.7881	276	38.961	276	38.2501	276	50.608	276	35.2235	276	32.9399	276	47.399	276	32.2255
TR749	VII	n.i.	211	5.1803	211	4.2304	211	2.4813	211	3.7297	211	2.604	211	4.6872	210	4.1306	211	4.3751	211	2.8719	211	3.33	211	5.1432	211	4.3496	211	3.5233	211	5.3963	211	4.2379	211	5.7004	211	4.9717	211	4.9194
			216	5.9493	216	4.9645	216	3.129	216	4.4823	216	3.4915	216	5.3143	216	4.8022	216	4.801	216	3.4042	216	3.9471	216	5.7033	216	5.0249	216	4.9626	216	5.7577	216	5.1226	216	6.4084	216	5.5196	216	5.5839
			223	4.8762	223	2.7208	223	1.775	223	2.4336	223	2.0982	223	2.8937	223	2.7224	223	2.707	223	1.9772	223	2.2092	223	4.6637	223	2.7367	223	4.4495	223	3.157	223	2.9614	223	3.4755	223	3.0059	223	3.0728
			228	2.62	228	1.8022	228	1.3602	228	1.7875	228	1.6803	228	1.9418	228	2.012	228	1.7682	228	1.3682	228	1.4922	228	2.3092	228	1.7512	228	3.4959	228	1.8014	228	2.1753	228	2.0693	228	1.8076	228	1.9533
TR495	VII	n.i.	170	61.0968	170	19.1682	170	28.8554	170	19.1324	170	41.4325	170	42.471	170	42.0545	170	42.8762	170	48.126	170	44.7641	170	42.7507	170	46.4256	170	55.6476	170	49.0936	170	22.0971	170	43.6662	170	48.4886	170	43.5639
TR335	VII	n.i.	252	8.3494	252	21.0123	252	14.0424	252	16.041	252	21.4602	252	18.4257	252	30.6139	252	23.6087	252	32.5157	252	23.3678	252	16.0898	252	18.369	252	9.7062	252	20.0059	252	24.7628	252	8.4081	252	7.2342	252	19.8868
			260	9.9555	-	-	-	-	-	-	-	-	-	-	-	-	-	-	-	-	-	-	-	-	-	-	-	-	-	-	-	-	260	9.9641	260	7.12	-	-
			286	6.3341	-	-	-	-	-	-	-	-	-	-	-	-	-	-	-	-	-	-	-	-	-	-	-	-	-	-	-	-	286	5.587	286	3.8058	-	-
			306	3.2772	-	-	-	-	-	-	-	-	-	-	-	-	-	-	-	-	-	-	-	-	-	-	-	-	-	-	-	-	306	3.4569	306	3.5387	-	-
			310	2.1817	310	6.4501	310	4.0899	310	4.5306	310	5.9881	310	5.8514	310	10.144	310	7.6124	310	10.124	310	7.1708	310	4.7918	310	6.0107	310	2.9665	310	6.334	310	7.9002	310	2.2321	310	2.2403	310	6.2704
TR453	VII	n.i.	131	15.1534	131	7.6143	131	7.5775	131	9.7118	131	10.9382	131	13.5403	131	9.5675	131	10.1607	131	14.9297	131	13.8162	131	9.479	131	10.4779	131	12.7212	131	15.8216	131	11.0709	131	12.6115	131	9.1414	131	8.8392
TR738	VII	n.i.	219	2.1757	219	1.3703	219	0.9149	219	1.1971	219	2.086	219	1.8995	219	2.2242	219	2.5024	219	3.326	219	1.945	219	1.1449	219	1.867	219	1.1413	219	1.8038	219	1.8704	219	1.4034	219	3.2237	219	1.7057
			227	1.27	227	1.7733	227	1.078	227	1.6904	227	1.5735	227	2.7371	227	2.6604	227	1.8911	227	2.5633	227	2.3498	227	1.4408	227	2.5947	227	1.3602	227	2.5506	227	2.9319	227	2.0372	227	2.2434	227	2.1119
759439	VII	n.i.	147	0.3267	147	1.821	147	1.1757	147	0.8859	147	2.4853	147	2.6724	147	1.6102	147	2.1187	147	2.6231	147	1.3895	147	1.8232	147	1.0002	147	1.186	147	1.7747	147	1.087	147	0.9192	147	1.4871	147	3.3424
			844	0.2953	844	1.6872	844	3.8724	844	0.483	844	1.2147	844	0.654	844	1.5629	844	0.3693	844	3.1355	844	0.2244	844	0.5902	844	1.1588	844	0.5054	844	3.9696	844	1.3413	844	0.1518	844	1.2197	844	2.4135
741119	VII	n.i.	665	0.6354	665	0.9829	665	0.0319	665	2.4138	665	2.2815	665	1.1698	665	1.7835	665	0.4919	665	5.2391	665	0.3946	665	0.5149	665	1.5924	665	0.5849	665	1.9654	665	0.2968	665	0.1949	665	0.598	665	1.5419
TR151	VII	n.i.	207	1.3704	-	-	-	-	-	-	-	-	-	-	-	-	-	-	-	-	-	-	-	-	-	-	-	-	-	-	-	-	207	1.0325	-	-	207	1.3219
			490	0.8396	490	1.7242	490	0.2325	490	2.3719	490	1.143	490	1.3893	490	2.0192	490	0.7199	490	4.53	490	0.4982	490	1.2405	490	3.052	490	1.2705	490	3.801	490	1.7227	490	0.6722	490	0.8896	490	1.2104
			502	0.5974	502	1.5872	502	0.1645	502	2.1726	502	1.0764	502	1.2925	502	2.0306	502	0.6329	502	4.6777	502	0.4417	502	1.1355	502	3.1251	502	1.211	502	4.1119	502	1.5939	502	0.4049	502	0.7671	502	0.9266
			554	0.1637	-	-	-	-	-	-	-	-	-	-	-	-	-	-	-	-	-	-	-	-	-	-	-	-	-	-	-	-	554	0.1767	554	0.2025	-	-
			598	0.0604	-	-	-	-	-	-	-	-	-	-	-	-	-	-	-	-	-	-	-	-	-	-	-	-	-	-	-	-	598	0.0668	598	0.0816	-	-
n.i.	no information
